# Supplementary material for: Long noncoding RNA LINC00673-v4 promotes aggressiveness of lung adenocarcinoma via activating WNT/β-catenin signaling
Source: PubMed Central journal article supplement — Proc Natl Acad Sci U S A. 2019 Jun 24;116(28):14019–28. doi: 10.1073/pnas.1900997116 (PMC6628810; doi:10.1073/pnas.1900997116), 2019-06-24
Supplement: pnas.1900997116.sapp.pdf [file pnas.1900997116.sapp.pdf]

## Supplementary Information for

**Long noncoding RNA LINC00673-v4 promotes aggressiveness of lung adenocarcinoma via activating WNT/ $\beta$ -catenin signaling**

Hongyu Guan, Ting Zhu, Shanshan Wu, Shihua Liu, Bangdong Liu, Jueheng Wu,  
Junchao Cai, Xun Zhu, Xin Zhang, Musheng Zeng, Jun Li, Erwei Song, Mengfeng Li

Corresponding author: Mengfeng Li  
Email: [limf@mail.sysu.edu.cn](mailto:limf@mail.sysu.edu.cn)

**This PDF file includes:**

Supplementary Materials and Methods  
Figs. S1 to S13  
Tables S1 to S15  
References for SI reference citations

## Supplementary Materials and Methods

**Tissue specimens and primary cell isolation.** The current study was conducted on 119 LAD specimens, which were histopathologically and clinically diagnosed at the Cancer Center of Sun Yat-sen University (SYSUCC) from 2001 to 2008. These specimens are defined as the SYSUCC cohort. Clinical information regarding the research subjects is summarized in *SI Appendix*, Table S2. LAD and paired adjacent non-cancerous lung specimens were stored frozen in liquid nitrogen until further use. Adjacent non-tumor specimens were obtained from a standard distance (3 cm) from the tumor margin in resected tissues of patients with LAD who underwent surgical lung resection and confirmed by pathological diagnosis. Prior patient consents and approval from the Institutional Research Ethics Committee of Sun Yat-sen University were obtained for the use of these clinical materials for research purposes.

The preparation of LAD cells from resected samples was conducted as described previously (1). Briefly, LAD cells freshly isolated from patients were rinsed twice with PBS supplemented with penicillin/streptomycin (Gibco, Grand Island, NY) and minced with scissors. Tumor fragments were immediately put into ACL4 medium supplemented with 5% fetal bovine serum and penicillin/streptomycin. After the removal of blood clots, the tissue pieces were collected and washed with PBS containing penicillin/streptomycin, followed by suspending the cells in ACL4 medium containing 5% fetal bovine serum and penicillin/streptomycin and incubated in collagen-coated flasks.

**Plasmids.** Full-length LINC00673-v4 was cloned into pSin-EF2-puro retroviral vector (Addgene, Cambridge, MA). For expressing short hairpin RNA (shRNA), oligonucleotides (target sequences see *SI Appendix*, Table S12) were annealed and then

ligated into the pSuper-retro-puro plasmid to generate pSuper-LINC00673-v4-shRNA1 and pSuper-LINC00673-v4-shRNA2. The reporter plasmids containing wild-type (CCTTTGATC; TOP flash) or mutated (CCTTTGGCC; FOP flash) TCF/LEF DNA binding sites were purchased from Upstate Biotechnology (Lake Placid, NY). pCMV6-Entry-DDX3 and pCMV6-Entry-CK1 $\epsilon$  were purchased from OriGene Technologies (Rockville, MD).

**Small interfering RNAs.** All siRNAs were synthesized by RiboBio (Guangzhou, China) and used at a final concentration of 10 nM. The sense strand sequences of siRNAs were summarized in *SI Appendix*, Table S12.

**5' and 3' rapid amplification of cDNA ends (RACE).** 5'- and 3'- RACE were performed to reveal the transcriptional initiation and termination sites of ENST00000457958.6 according to the manufacturer's instructions using SMARTer RACE 5'/3' Kit (TaKaRa, Tokyo, Japan). Briefly, total RNA was extracted from human PC9 and HCC827 cells using the Trizol reagent (Invitrogen, San Diego, CA) and treated with DNase I, followed by SMARTer first-strand cDNA synthesis to generate 5'-RACE or 3'-RACE ready cDNA. The 5'-RACE and 3'-RACE PCRs were then performed using multiple primers (*SI Appendix*, Fig. S2B and Table S13). PCR fragments were purified and cloned into the pMD19-T vector using the In-Fusion HD Cloning reagent provided in the kit. The plasmids containing the inserts were subsequently Sanger sequenced.

**Generation of stably engineered cell lines.** Plasmid pSin-LINC00673-v4 was cotransfected with pMD2G and psPAX2 packaging plasmids in 293FT cells using standard calcium phosphate transfection method (2). The two LINC00673-v4 shRNA

plasmids were transfected into the PT67, an NIH3T3-derived packaging cell line (Clontech, Mountain View, CA), using Lipofectamine 3000 reagent (Invitrogen, San Diego, CA). Subsequently, the supernatants were collected and incubated with cells to be infected for 24 h in the presence of polybrene (8 µg/ml). After infection, puromycin (1 µg/ml) was used for 10 days to select stably transduced cells.

**Western blotting (WB) analysis.** WB analysis was performed according to a previously described standard method (3) using antibodies anti-CK1ε and anti-DDX3 (1:1000; Bethyl Laboratories, Montgomery, TX), anti-Flag (1:2000; Sigma, St Louis, MO), anti-β-catenin, anti-TCF4, and anti-LEF1 (1:1000; Abcam, Cambridge, MA), and PCNA (1:1000; BD Biosciences, San Jose, CA). The blotted membranes were then stripped and re-blotted with anti-α-tubulin (1:2000; Sigma) mouse monoclonal antibody as a loading control.

**RNA extraction and quantitative reverse transcription-PCR (qRT-PCR).** Total RNA was isolated from cultured cells or surgically resected fresh LAD tissues using TRIzol (Invitrogen) according to the manufacturer's instructions. Total RNA of the formalin-fixed paraffin-embedded (FFPE) tissue sections was isolated using the RecoverAll™ Total Nucleic Acid Isolation Kit for FFPE according to the supplier's instruction. The first-strand cDNA was generated by RT using MMLV transcriptase (Promega, Madison, WI) and random primers. Real-time qRT-PCR was performed on a CFX96 real-time PCR detection system (Bio-Rad, Richmond, CA). The sequences of the primers are listed in *SI Appendix*, Table S14.

**Cell nucleus/cytoplasm fraction isolation.** Cell nucleus/cytoplasm fraction isolation was performed using Nuclear and Cytoplasmic Extraction Kit (Thermo, Waltham, MA)

according to the supplier's recommendation.

**RNA fluorescence in situ hybridization (FISH).** Cells were briefly rinsed with PBS and then fixed with 4% formaldehyde (pH 7.4) for 15 min at room temperature. Then the cells were permeabilized in 1 ml of 70% ethanol for at least 1 h at 4°C, washed in PBS 3 × 5 min at room temperature and rinsed once with 2 × saline-sodium citrate (SSC) prior to hybridization. Hybridization was carried out using anti-LINC00673 oligodeoxynucleotide probe sets (125 nM) (Exiqon, Vedbaek, Danmark) for 16 h at 37°C in a moist chamber according to the protocol from Biosearch Technologies. Subsequently, the cells were washed for 30 min in 10% deionized formamide/2×SSC at 37°C. The cells on cover-slips were counterstained with 4', 6-diamidino-2-phenylindole (DAPI), and images were obtained with a fluorescence microscope (Carl Zeiss, Oberkochen, Germany).

**In situ Proximity ligation assays (PLA).** Interactions between DDX3 and CK1ε were detected by *in situ* PLA. The assay was performed using Duolink<sup>®</sup> PLA Kit (Sigma) according to the supplier's instruction.

**Wound healing, cell invasion, and migration assays.** For wound healing assay, confluent cells in 6-well plates were pretreated with 10 µg/ml mitomycin C (Sigma) for 2 h to inhibit cell mitosis and then scratched with a pipette tip. Progression of migration was observed and photographed at indicated times. For cell invasion and migration assays, Transwell chambers (Corning) with or without coated Matrigel (BD Biosciences) were used. Indicated cells were pretreated with 10 µg/ml mitomycin C (Sigma) for 2 h, subsequently trypsinized and resuspended in DMEM without FBS. The cells were then seeded into the upper compartment of the Transwell chambers, and the lower chambers

were filled with 500  $\mu$ l DMEM supplemented with 10% fetal bovine serum as a chemoattractant. After incubation for 24 h, cells having invaded to the bottom side of the inserts were fixed, stained, photographed, and quantified by counting in 5 random fields.

**Analysis of gene copy number by qPCR.** Genomic DNA were isolated from paraffin embedded tumor by QIAmp DNA FFPE Tissue Kit (Qiagen, Dusseldorf, Germany) following the manufacturer's instruction. Copy number gain of LINC00673 was determined by qPCR assay as previously reported (4). Primer sequences are provided in *SI Appendix*, Table S14.

**ISH and Immunohistochemistry (IHC).** LAD paraffin-embedded sections were dewaxed and rehydrated, then the samples were treated with proteinase K, fixed in 4% paraformaldehyde and further hybridized with 40 nM digoxin-labeled LINC00673 probe (Exiqon, sequence see *SI Appendix*, Table S15) at 55°C overnight. After incubation for 1 h at room temperature with anti-digoxin monoclonal antibody (Roche), the sections were stained with Nuclear Fast Red (2-anthracenesulfonic acid, 4-amino-9, 10-dihydro-1, 3-dihydroxy-9, 10-dioxo-, monosodium salt), mounted and examined. IHC assays were performed and quantified as previously described (5), using the following primary antibodies: anti-VEGF (1:100; Abcam), anti-MMP9 (1:100; Abcam), anti-Twist (1:100; Abcam), anti-HOXB9 (1:100; Abcam) and anti- $\beta$ -catenin (1:200; Abcam). The staining scores were determined based on both the intensity and proportion of positive cells in 10 random fields. Scores representing the proportion of positively stained tumor cells in sections was graded as follows: 0, no positive cells; 1, <10%; 2, 10%-50%; and 3, >50%. The staining intensity was recorded on a scale of 0 (no staining), 1 (weak staining), 2 (moderate staining), and 3 (strong staining). The staining index (SI) was calculated as

follows:  $SI = \text{staining intensity} \times \text{proportion of positively stained cells}$ , resulting in scores of 0, 1, 2, 3, 4, 6, or 9. The selection of cutoff scores were based on receiver operating characteristic (ROC) curve analysis. ROC curve was generated by plotting the sensitivity and specificity of each score. The score located closest to the point with both maximum sensitivity and specificity was determined as the cutoff score (6, 7).

**Northern blotting analysis.** Total RNA was isolated from LAD cells and ribosomal RNA was depleted using Ribo-off rRNA Depletion Kit (Vazyme, Jiangsu, China) according to the manufacturer's instructions. Then the isolated RNA was dissolved in  $2 \times$  RNA loading buffer (95% formamide, 0.025% lauryl sodium sulfate, 0.025% bromophenol blue, 0.025% xylene cyanol, 0.025% ethidium bromide and 0.5 mM edetic acid). Samples were loaded onto 15% denaturing TBE-urea gels and then transferred onto positively charged nylon membranes (Roche, Basel, Switzerland). The blotted membranes were prehybridized at 65°C for 1 h using hybridization buffer (Roche) and subjected to hybridization with digoxin-labelled DNA probe (50  $\mu$ M) targeted against LINC00673 (Exiqon, Vedbaek, Danmark) overnight at room temperature. Probe (for sequence, see *SI Appendix*, Table S15) detection was performed using a digoxin Luminescent Detection Kit (Roche) according to the manufacturer's protocol. After the blots were equilibrated in detection buffer, they were incubated with the chemiluminescent substrate CDP-Star and used to expose Kodak Biomax MR film.

**Co-immunoprecipitation (Co-IP).** Indicated cells were washed in PBS and lysed with cell lysis buffer (25 mM HEPES, 150 mM NaCl, 1 mM EDTA, 1% NP-40, 2% Glycerol, 0.2% Cocktail, pH 7.4) supplemented with RNase inhibitor (Promega), and the lysates were then captured by 50  $\mu$ l of anti-Flag magnetic beads or anti-mouse immunoglobulin

G (IgG) agarose beads (Sigma). After 24 h, the magnetic beads were washed six times with wash buffer (20 mM HEPES, 300 mM NaCl, 1 mM EDTA, 0.1% NP-40, and 0.1% Glycerol, pH 7.4). Both the input and co-IP samples were analyzed by WB analysis using anti-Flag or anti-CK1 $\epsilon$  antibodies as described above.

**RNA immunoprecipitation (RIP).** RIP was performed using Magna RIP RNA-Binding Protein Immunoprecipitation Kit (Millipore, Billerica, MA) according to the manufacturer's instructions with additional UV crosslink step as described previously (8). Briefly, indicated cells in 10 ml ice-cold PBS were UV-crosslinked with 100,000  $\mu\text{J}/\text{cm}^2$  twice (1-sec interval). Cells ( $2 \times 10^7$ ) were lysed in 100  $\mu\text{l}$  RIP lysis buffer with 0.5  $\mu\text{l}$  of protease inhibitor cocktail and 0.25  $\mu\text{l}$  of RNase inhibitor, and supernatants were collected after centrifugation. Ten microliters of supernatant of the RIP lysate was saved as input. For each RIP, 50  $\mu\text{l}$  protein G magnetic beads with 5  $\mu\text{g}$  anti-DDX3, anti-CK1 $\epsilon$ , anti-HuR, or IgG (Abcam) were prepared in a microfuge tube as instructed. One hundred microliters of supernatant of the RIP lysate was added to each beads-antibody complex in 900  $\mu\text{l}$  RIP immunoprecipitation buffer (containing 860  $\mu\text{l}$  RIP wash buffer, 35  $\mu\text{l}$  0.5 M EDTA and 5  $\mu\text{l}$  RNase inhibitor). The samples were mixed by rotation overnight at 4°C, and the beads were then washed six times with the RIP wash buffer. Each immunoprecipitation or input sample was re-suspended in 150  $\mu\text{l}$  of proteinase K buffer (107  $\mu\text{l}$  of RIP Wash Buffer, 15  $\mu\text{l}$  of 10% SDS, and 18  $\mu\text{l}$  of proteinase K) and incubated at 55°C for 30 min with shaking to digest the protein. Samples were centrifuged, and the supernatants were collected for RNA extraction. RNA extraction was performed using TRIzol (Invitrogen) according to the manufacturers' instruction. cDNA synthesis and qPCR were performed as usual.



**RNA pull-down assay.** RNAs were in vitro transcribed using T7 High Yield RNA Synthesis Kit (Ambion, Austin, TX) according to the manufacturer's instructions. The transcribed RNA was labeled using RNA 3' End Biotinylation Kit (Thermo, Waltham, MA), and RNA binding protein was enriched with an RNA-protein pull-down kit (Thermo, Waltham, MA) according to the manufacturer's instructions. In Brief, indicated cell lysates were prepared using the Pierce<sup>TM</sup> IP Lysis Buffer (protein concentration > 2mg/ml). Fifty microliters streptavidin magnetic beads were washed with 20 mM Tris (pH 7.5) twice and re-suspended by an equal volume of 1 × RNA Capture Buffer, followed by addition of 50 pmol labeled RNA to the beads and incubation at room temperature for 30 min with agitation. Antisense-LINC00673-v4 RNA was biotinylated and served as a control. The supernatant was removed and discarded, and the beads were washed twice with 20 mM Tris (pH 7.5). 1 × Protein-RNA Binding Buffer was then added to the beads and the supernatant was discarded. Subsequently, 100 µl of Master Mix (20 µl cell lysate, 10 µl 10 × Protein-RNA Binding Buffer, 30 µl 50% glycerol, and 40 µl nuclease-free water) was added to RNA-bound beads and incubated for 1 h at 4°C with rotation. The protein-RNA-beads mixture was washed with 1 × wash buffer for three times. After the wash, 50 µl of Elution Buffer was added to incubate with the beads for 30 min at 37°C with agitation. The eluted samples were boiled in SDS buffer for 5 min at 95-100°C and then the retrieved proteins were examined by Western blotting or resolved in gradient gel electrophoresis followed by mass spectrometry identification.

**Luciferase reporter assay.** Cells were seeded in triplicate in 48-well plates and allowed to settle for 24 hours. Indicated plasmids plus 5 ng pRL-TK-Renilla were transfected into the cells with the Lipofectamine 3000 reagent (Invitrogen, San Diego,

CA). After 48 hours, dual-luciferase reporter assay was performed using a commercial kit (Promega, Madison, WI) as previously described (9).

**Tumor xenografts in vivo.** All experimental procedures were approved by the Institutional Animal Care and Use Committee of Sun Yat-sen University. At least five nude mice per group were used to ensure the adequate power and each mouse with different weight was randomly allocated. For tail vein injection,  $1 \times 10^6$  cells in 0.1 ml PBS were injected into the lateral tail vein of age-matched female BALB/c mice. For intracardiac injection,  $1 \times 10^5$  cells were resuspended in 0.1 ml PBS and inoculated into the left cardiac ventricle of age-matched female BALB/c mice. For the antisense LNA<sup>TM</sup> GapmeRs treatment study,  $1 \times 10^6$  cells in 0.1 ml PBS were injected into the lateral tail vein of age-matched female BALB/c mice. One week after injection, mice received a dose of 25 mg/kg LINC00673-v4 antisense LNA<sup>TM</sup> GapmeRs or antisense LNA<sup>TM</sup> GapmeRs negative control (PBS) weekly via tail vein injection. Metastasis was monitored by bioluminescence imaging. Briefly, mice were given D-luciferin (150 mg/kg i.v., 10 min before imaging), anaesthetized (3% isoflurane) and imaged with the Xenogen IVIS Spectrum Imaging System (Caliper Life Sciences, Hopkinton, MA). Images were analyzed with Spectrum Living Image 4.0 Software (Caliper Life Sciences). ICG-001 (Selleck Chemicals, Houston, TX), a small molecule known to inhibit Wnt/ $\beta$ -catenin signaling, was intraperitoneally injected at 5 mg/kg 6 days/week. At the end of observation, the mice were killed by cervical dislocation and the lungs were collected to count surface metastases under a dissecting microscope. Extracted lungs were embedded in paraffin using the routine method. Hematoxylin & eosin (H&E) staining was

performed on sections from paraffin-embedded samples for histological evidence of the tumor phenotype.

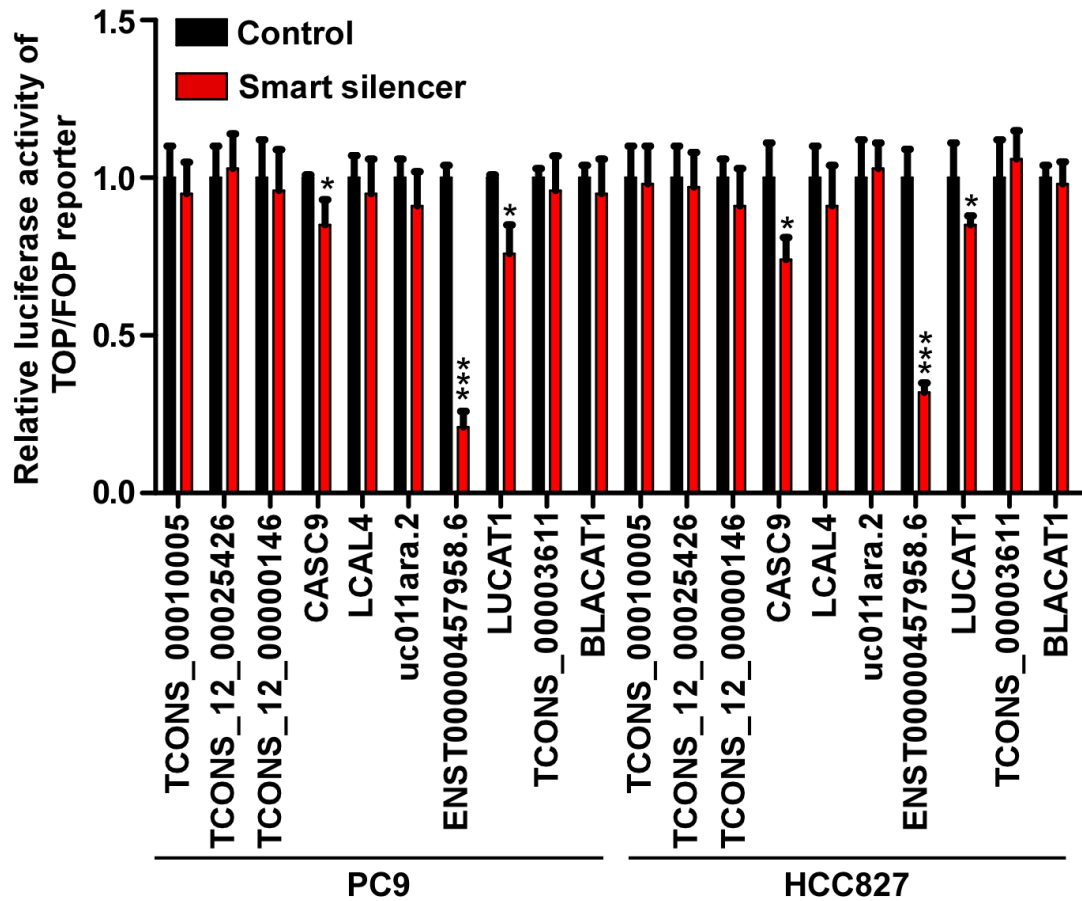

**Fig. S1. Quantitative measurement of Wnt/ $\beta$ -catenin activation.**

Reporter activity detected was normalized by Renilla luciferase activity (each bar represents the mean  $\pm$  SD derived from three independent experiments, two-tailed Student's t test. \* $P < 0.05$ , \*\*\* $P < 0.001$ ).

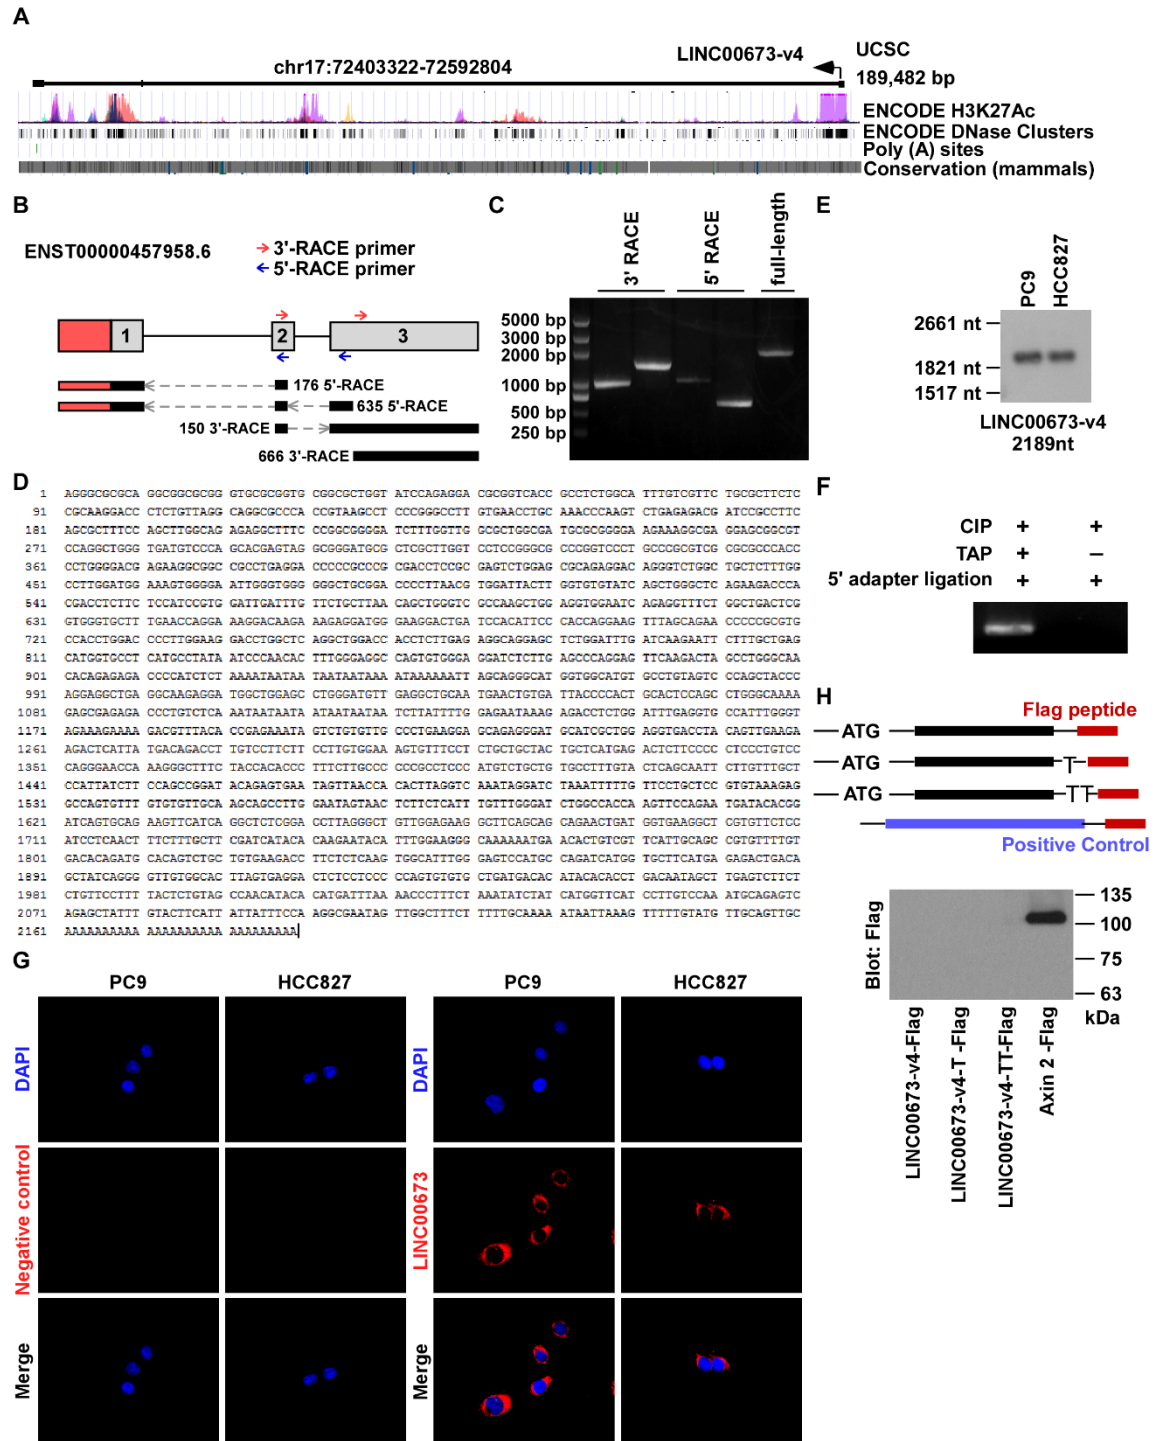

**Fig. S2. Characterization of LINC00673-v4.**

(A) Diagrammatic sketch of LINC00673-v4 genomic DNA structure. The transcription start site of LINC00673-v4 exhibits acetylated H3K27 (H3K27Ac) signal and DNase I

hypersensitivity. LINC00673-v4 has high evolutionary conservation in mammals. (B) Schematic overview of primers for RACE assay. (C) The images of PCR products from the 5'-RACE and 3'-RACE procedure. (D) The sequence of the full length of LINC00673-v4. (E) Northern blot analysis of the full length of LINC00673-v4. (F) LINC00673-v4 has 5' cap structure. Total RNA was treated sequentially with Calf Intestine Alkaline Phosphatase (CIP) and Tobacco Acid Pyrophosphatase (TAP) to remove free 5'-P and the cap structure, respectively. Then a RNA adapter oligonucleotide was ligated to the RNA population (FistChoice RLM-RACE Kit, Ambion). RT-PCR was used to detect LINC00673-v4. (G) Representative images of LINC00673 expression in PC9 and HCC827 cells using RNA FISH assays. DAPI, 4', 6-diamidino-2-phenylindole. The samples were also tested for hybridization with a LINC00673-v4 sense probe (negative control [NC]) to verify the specificity of RNA-FISH interaction. (H) Full-length of LINC00673-v4 was cloned into pcDNA3.1 with an transcription initiating codon ATG and C-terminal Flag peptide in three expression patterns. Anti-flag antibody was used to probe transcribed proteins. Axin2 with Flag tag served as a positive control.

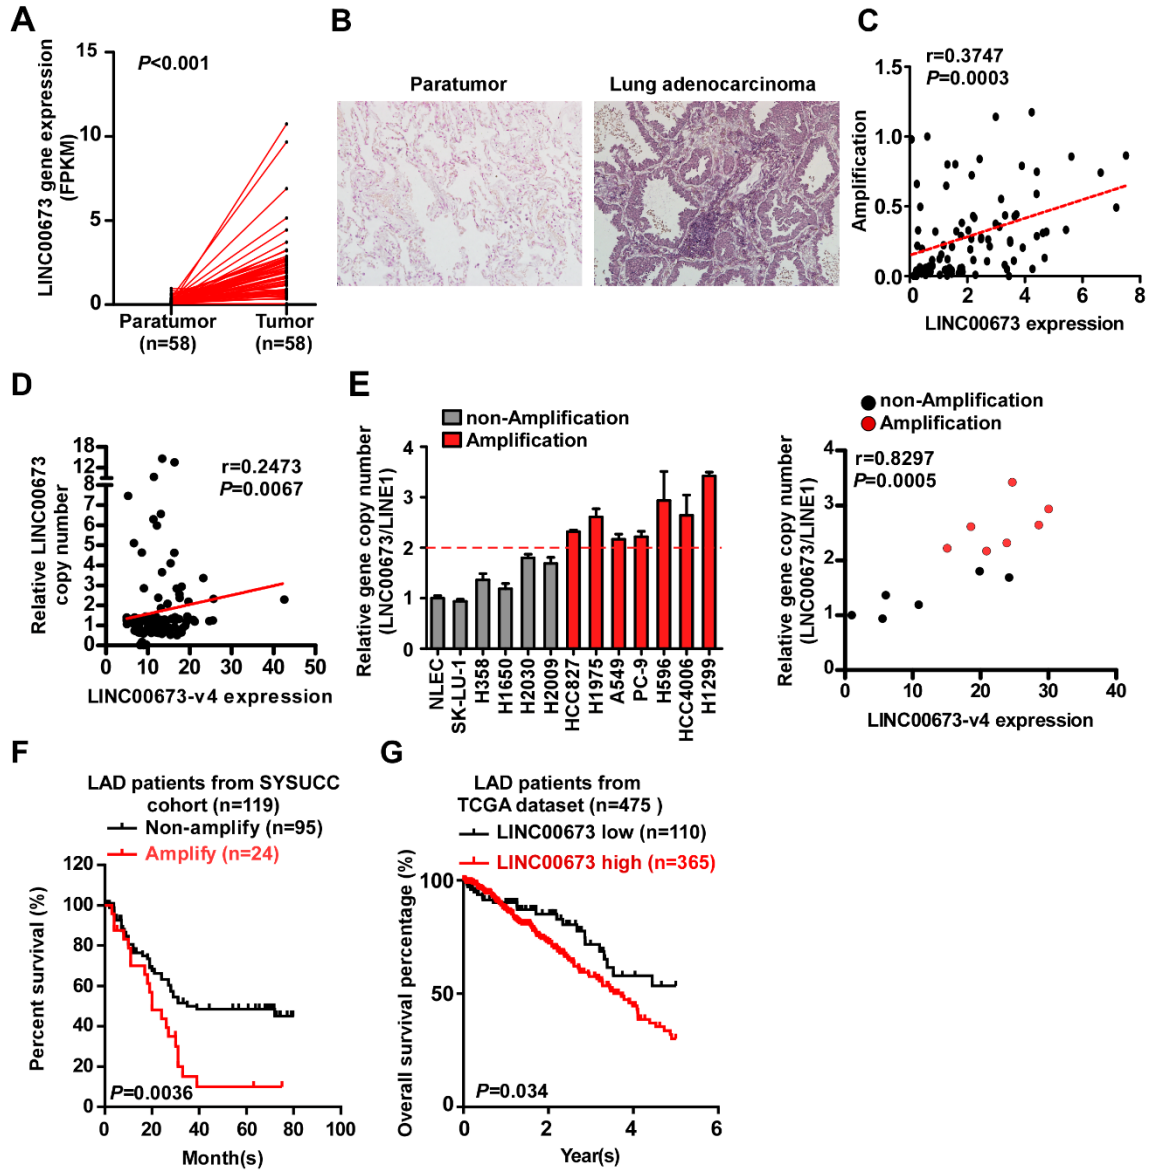

**Fig. S3. LINC00673 is highly expressed in LAD.**

(A) Analyses of the expression levels of LINC00673 in paired LAD and adjacent non-tumorous tissues (n=58) using TCGA dataset (two-tailed paired Student's *t* test). (B) Representative images of LINC00673 expression in SYSUCC LAD cohorts and normal lung tissues using ISH assays. (C) The expression level of LINC00673 positively correlates with its amplification status in TCGA dataset. (D and E) Correlation analysis between amplification status of LINC00673 and its expression in the SYSUCC cohort

(D) and LAD cell lines (E) (Correlation was assessed using Spearman correlation coefficient). (F) Kaplan-Meier survival analysis of LAD patients in the SYSUCC cohort stratified by LINC00673-v4 genomic amplification status. The selection of cutoff scores were based on receiver operating characteristic (ROC) curve analysis. (G) Overall survival was assessed in patients with LAD using the TCGA dataset. Determination of the optimal cutoff value for predicting survival was performed by using X-tile bioinformatics software version 3.6.1.



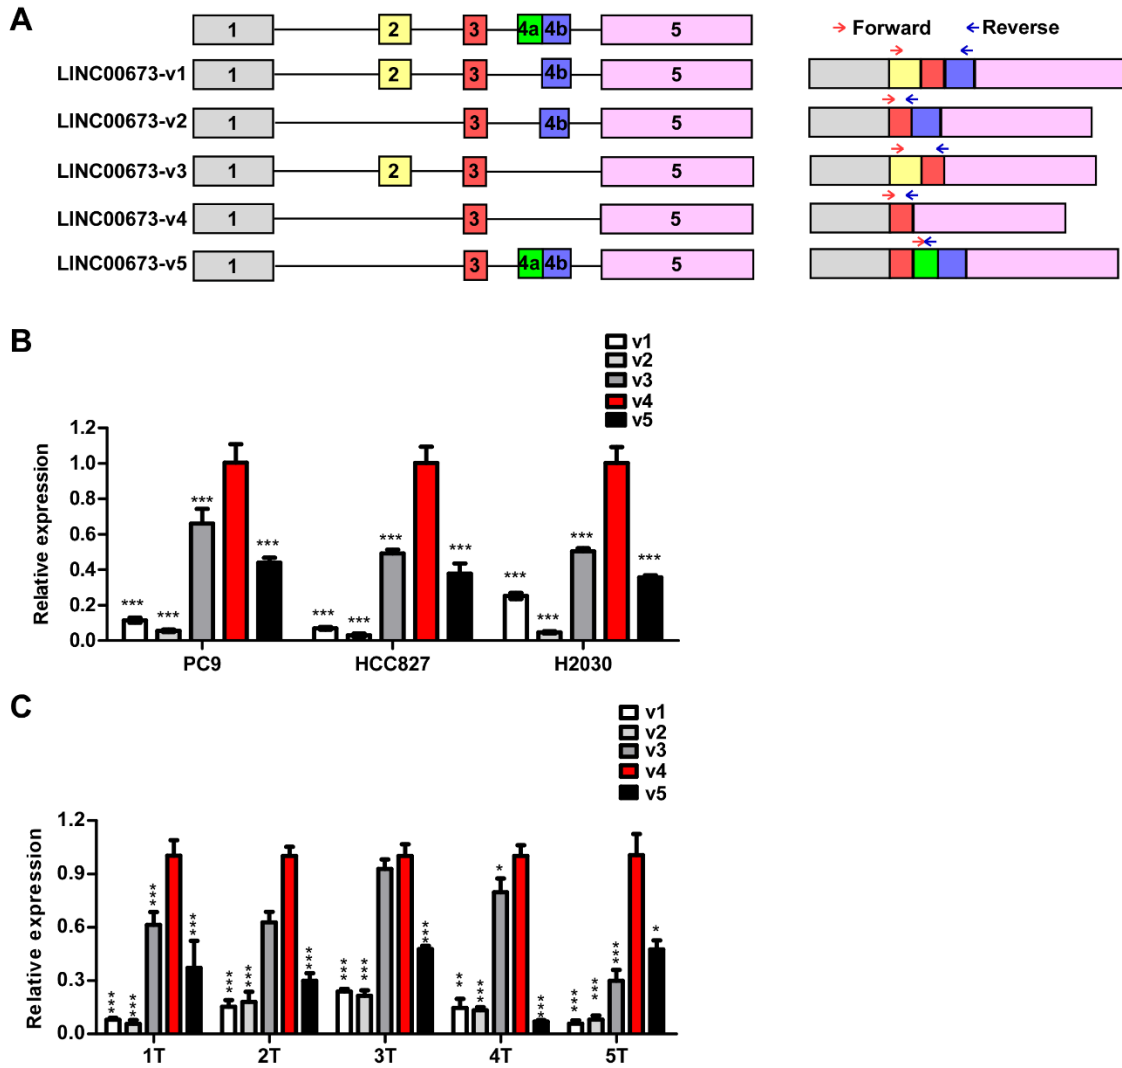

**Fig. S4. Abundance of transcript variants of LINC00673 in LAD.**

(A) Schematic overview of variant-specific primers for LINC00673. (B and C)

Abundance of transcript variants of LINC00673 in PC9, HCC827, and H2030 LAD cell lines (B) and LAD specimens (C) (each bar represents the mean  $\pm$  SD derived from three experiments, one-way ANOVA followed by Dunnett's multiple comparison test.  $*P < 0.05$ ,  $**P < 0.01$ ,  $***P < 0.001$ ).

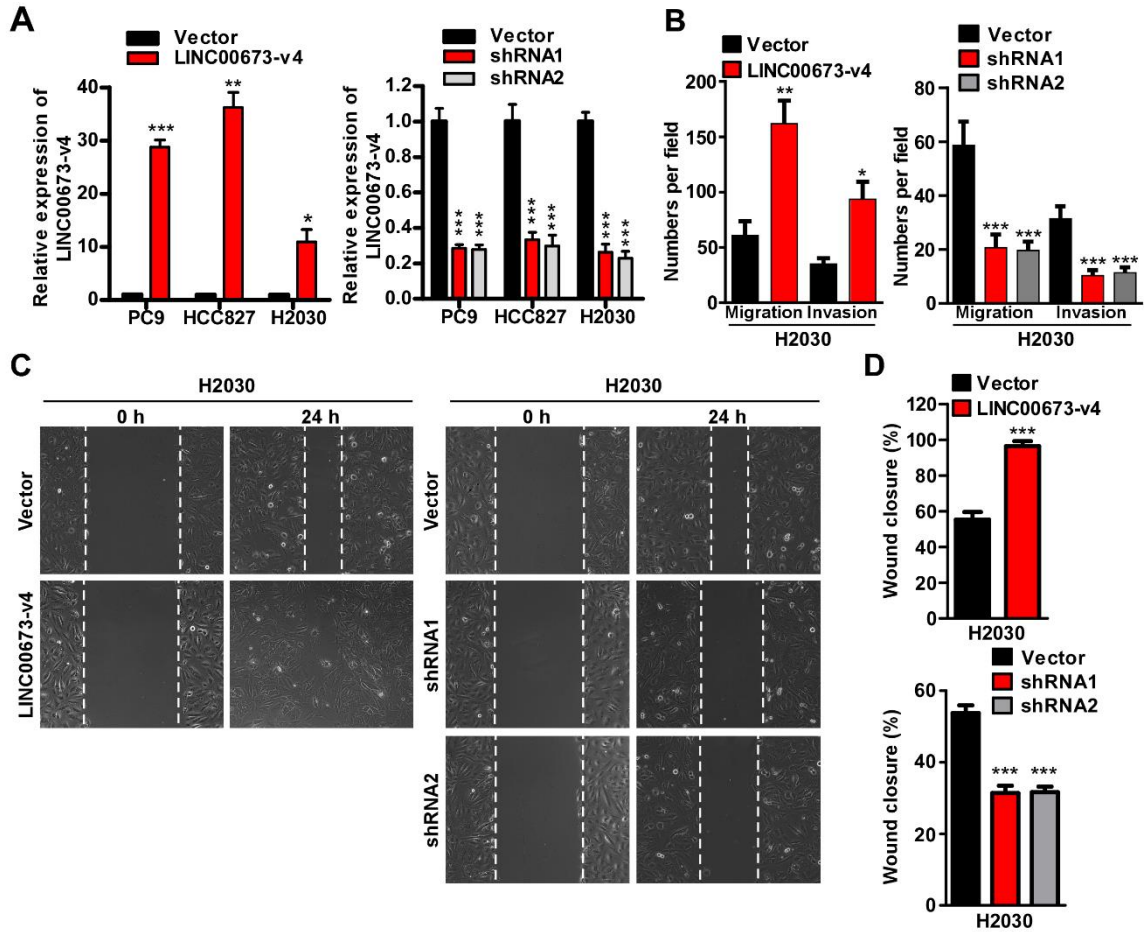

**Fig. S5. LINC00673-v4 regulates LAD cell invasion and migration *in vitro*.**

(A) PC9, HCC827 and NCI-H2030 cell lines stably transduced with ectopic LINC00673-v4 or knocked down for LINC00673-v4 were constructed (left: each bar represents the mean  $\pm$  SD derived from three independent experiments, two-tailed Student's t test; right: each bar represents the mean  $\pm$  SD derived from three experiments, one-way ANOVA followed by Dunnett's multiple comparison test. \* $P < 0.05$ , \*\* $P < 0.01$ , \*\*\* $P < 0.001$ ).

(B) Quantification of indicated invading or migrating cells analyzed by Matrigel-coated or -noncoated Transwell assays, respectively (left: each bar represents the mean  $\pm$  SD derived from three independent experiments, two-tailed Student's t test; right: each bar represents the mean  $\pm$  SD derived from three experiments, one-way ANOVA followed by

Dunnett's multiple comparison test.  $*P < 0.05$ ,  $**P < 0.01$ ,  $***P < 0.001$ ). (C)

Representative micrographs of wound healing assay of indicated cells. Wound closures were photographed at indicated time after wounding. (D) Quantification of wound closures of the indicated cells (up: each bar represents the mean  $\pm$  SD derived from three independent experiments, two-tailed Student's t test; down: each bar represents the mean  $\pm$  SD derived from three experiments, one-way ANOVA followed by Dunnett's multiple comparison test.  $***P < 0.001$ ).

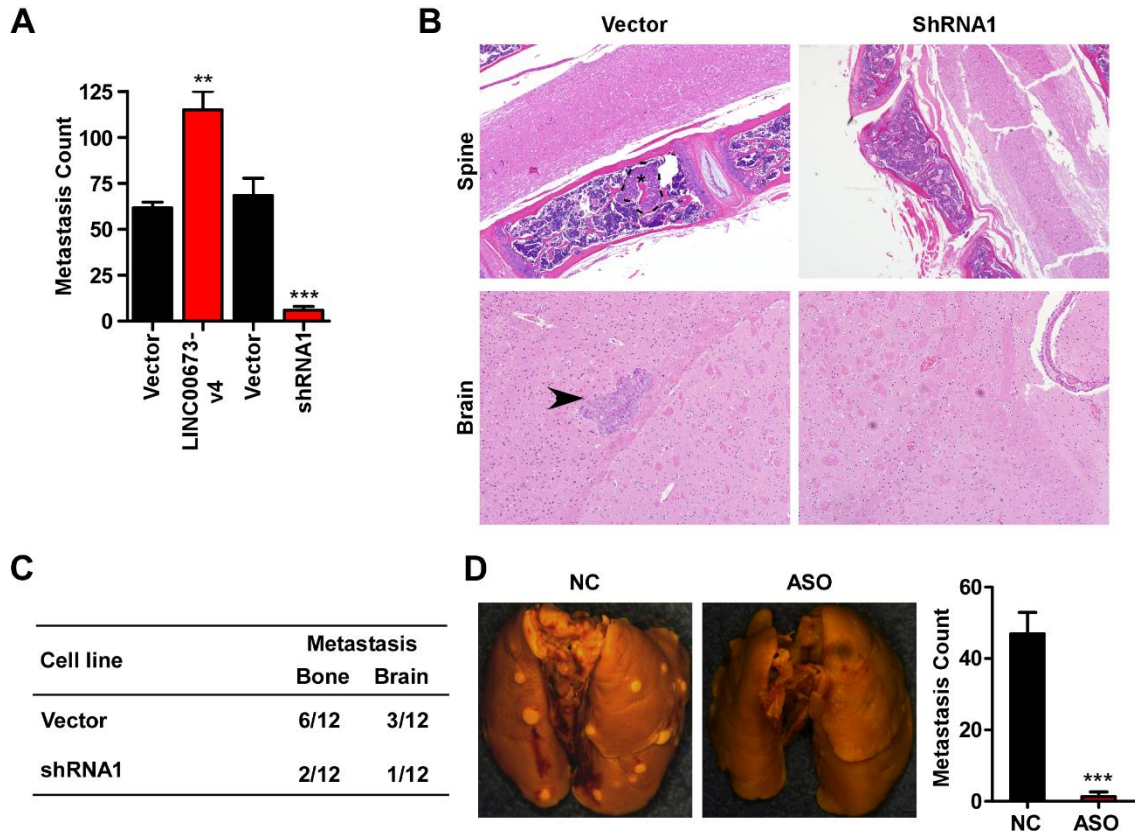

**Fig. S6. LINC00673-v4 promotes LAD cell metastasis.**

(A) Number of visible surface metastatic lesions in mice ( $n = 5$  per group) receiving tail vein injection of indicated cells (each bar represents the mean  $\pm$  SD, two-tailed Student's  $t$  test.  $*P < 0.05$ ,  $**P < 0.01$ ,  $***P < 0.001$ ). (B) Metastatic bone and brain lesions in mice were confirmed by H&E staining. (C) The number of mice in which the metastatic lesions were detected is summarized. (D) Representative bright-field imaging of the lungs are shown (left). Number of visible surface metastatic lesions in mice ( $n = 10$  per group) (right, two-tailed Student's  $t$  test,  $***P < 0.001$ ).

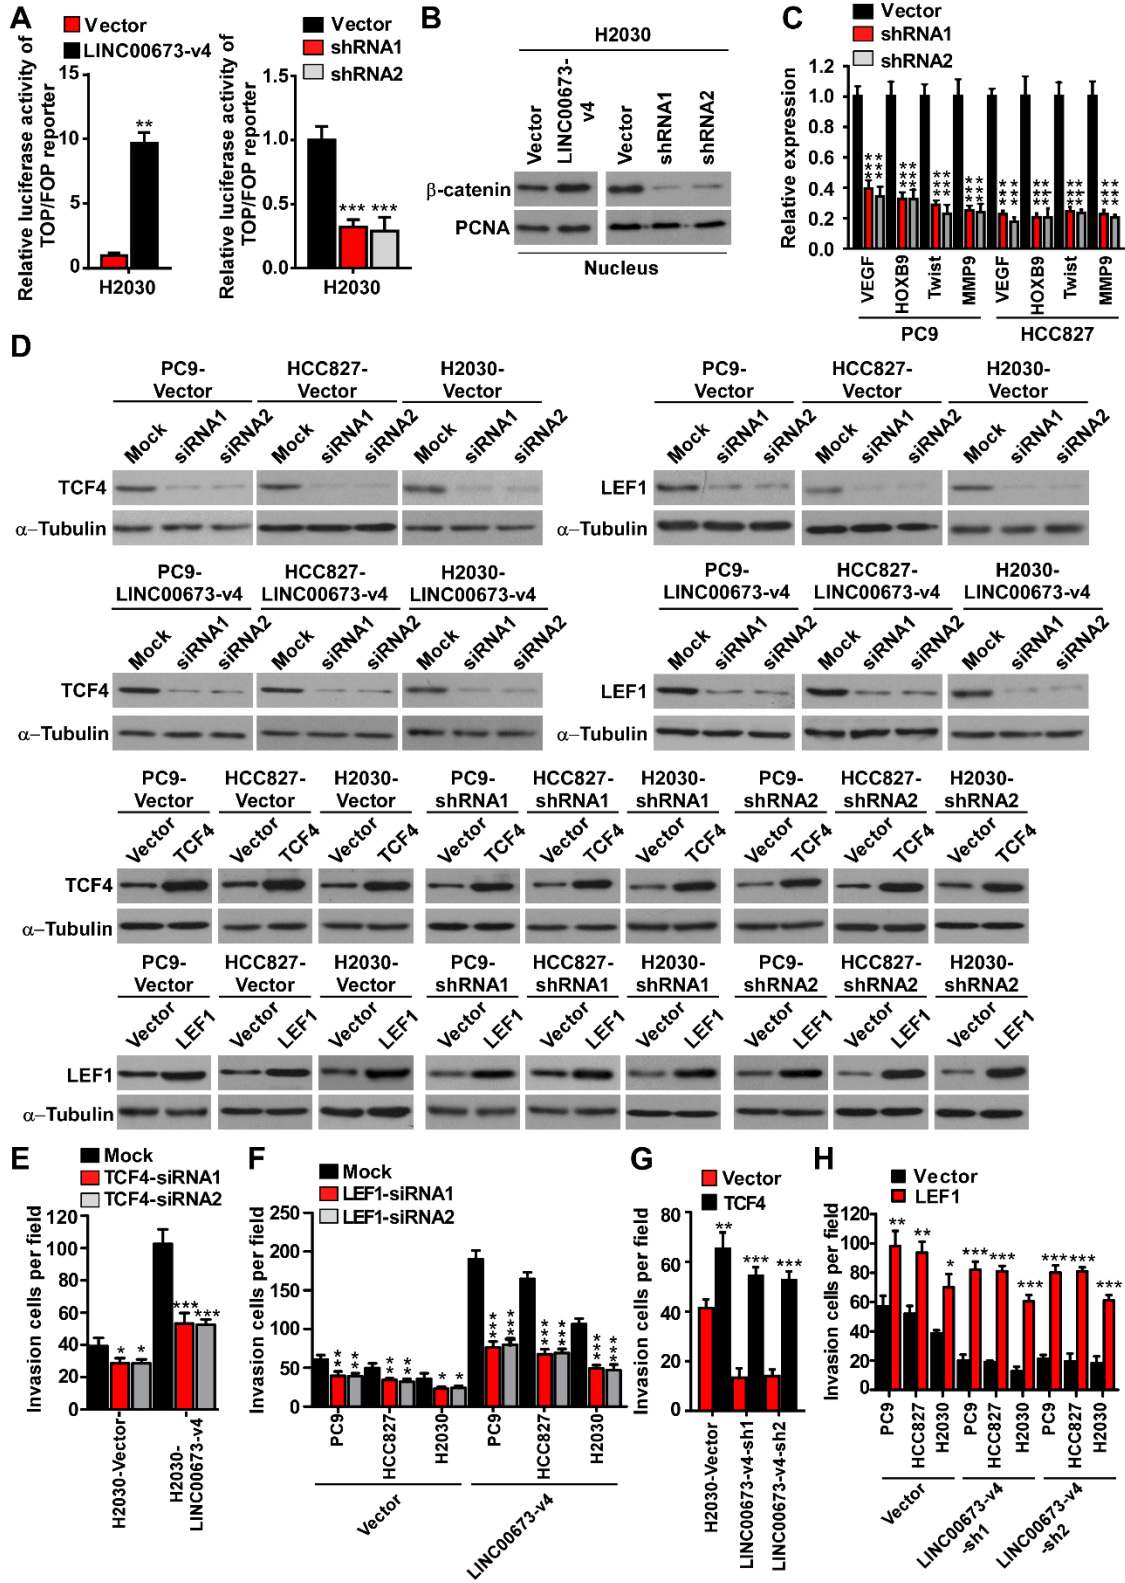

Fig. S7. LINC00673-v4 activates WNT/ $\beta$ -catenin signaling.

(A) NCI-H2030 cells were transfected with TOP-flash or FOP-flash and Renilla pRL-TK plasmids, and dual-luciferase assays were performed 48 h after transfection. The reporter activity was normalized by Renilla luciferase activity (left: each bar represents the mean  $\pm$  SD derived from three independent experiments, two-tailed Student's t test; right: each bar represents the mean  $\pm$  SD derived from three experiments, one-way ANOVA followed by Dunnett's multiple comparison test.  $**P < 0.01$ ,  $***P < 0.001$ ). (B) Altered nuclear translocation of  $\beta$ -catenin in response to LINC00673-v4 overexpression in NCI-H2030 cells were analyzed by WB analysis. (C) The expression levels of MMP9, Twist, VEGF, and HOXB9 were decreased by silencing of LINC00673-v4 (each bar represents the mean  $\pm$  SD derived from three experiments, one-way ANOVA followed by Dunnett's multiple comparison test.  $***P < 0.001$ ) in LAD cells. (D) Expression levels of TCF4 and LEF1 in indicated cells were analyzed by WB. (E and F) Quantification of invading cells using Transwell invasion assay in LINC00673-v4-overexpressing and vector-control cells with silencing of TCF4 (E) or LEF1 (F) (each bar represents the mean  $\pm$  SD derived from three experiments, one-way ANOVA followed by Dunnett's multiple comparison test.  $*P < 0.05$ ,  $**P < 0.01$ ,  $***P < 0.001$ ). (G and H) Quantification of invading cells by overexpression of TCF4 (G) or LEF1 (H) in LINC00673-v4-silencing and vector-control cells (each bar represents the mean  $\pm$  SD derived from three independent experiments, two-tailed Student's t test.  $*P < 0.05$ ,  $**P < 0.01$ ,  $***P < 0.001$ ).

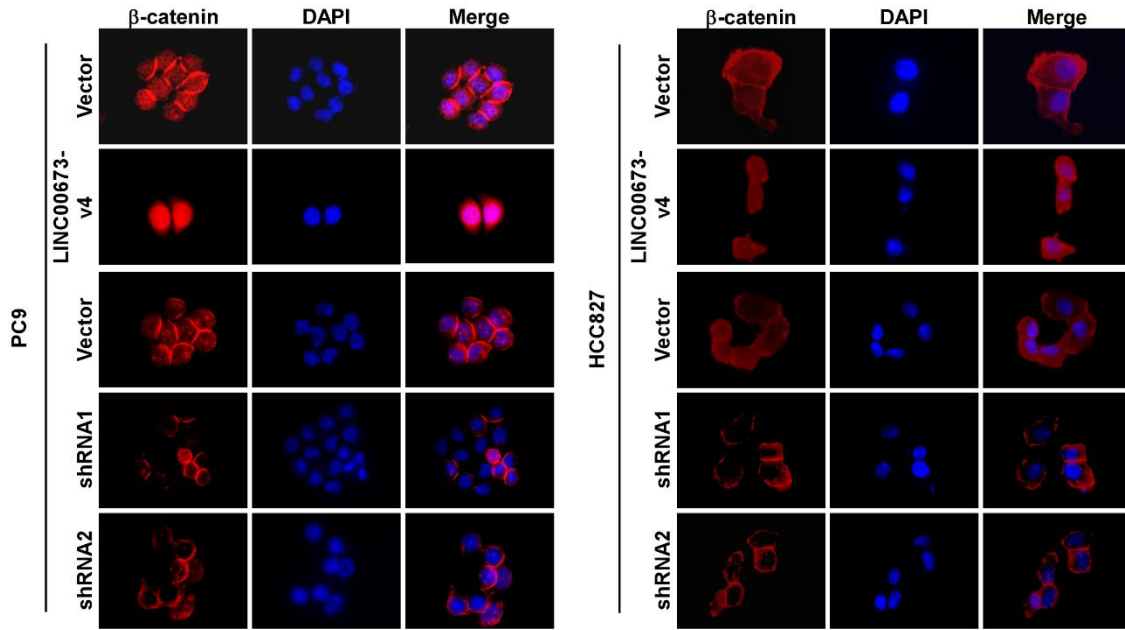

**Fig. S8. Subcellular  $\beta$ -catenin localization in indicated cells.**

Subcellular  $\beta$ -catenin localization was assessed using immunofluorescence staining and representative images are shown.

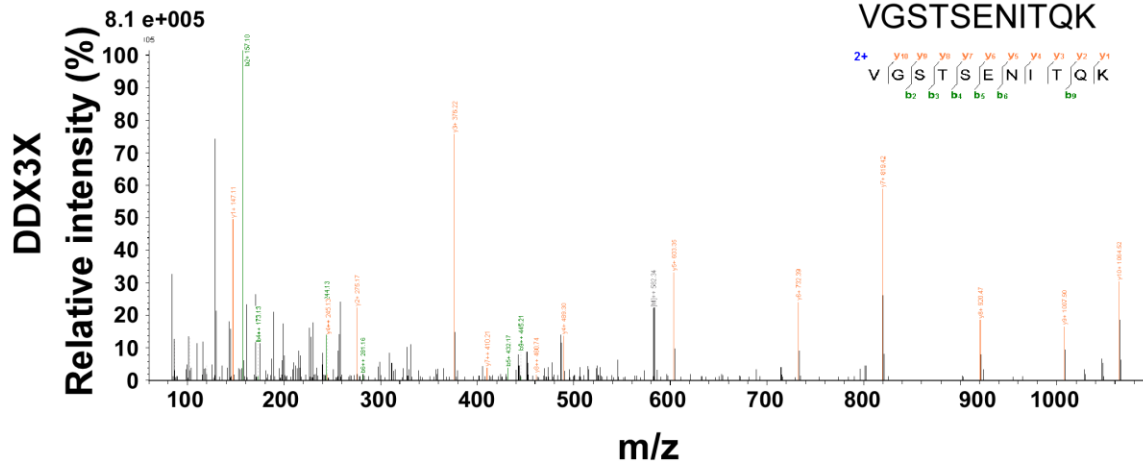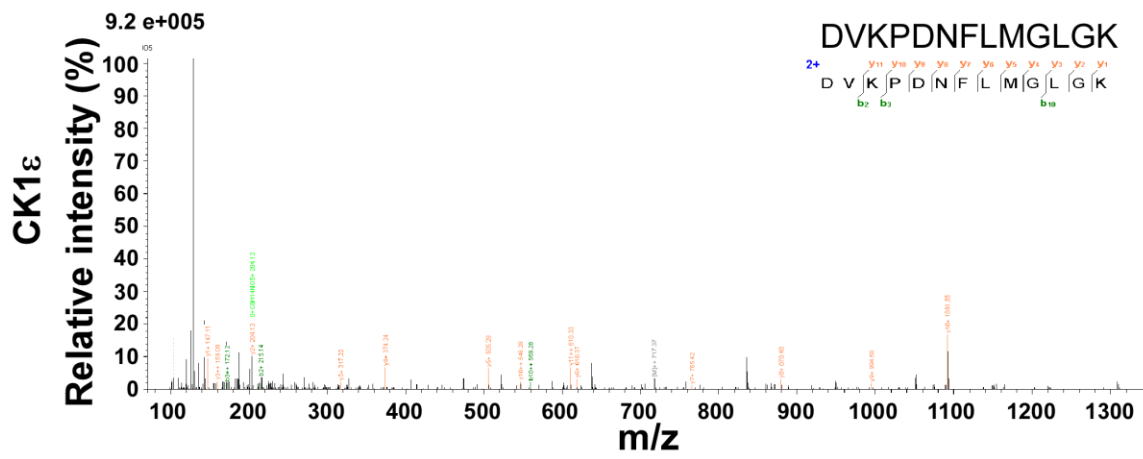

**Fig. S9. The mass spectrum analysis of specific bands.**

Specific bands were identified by mass spectrum.



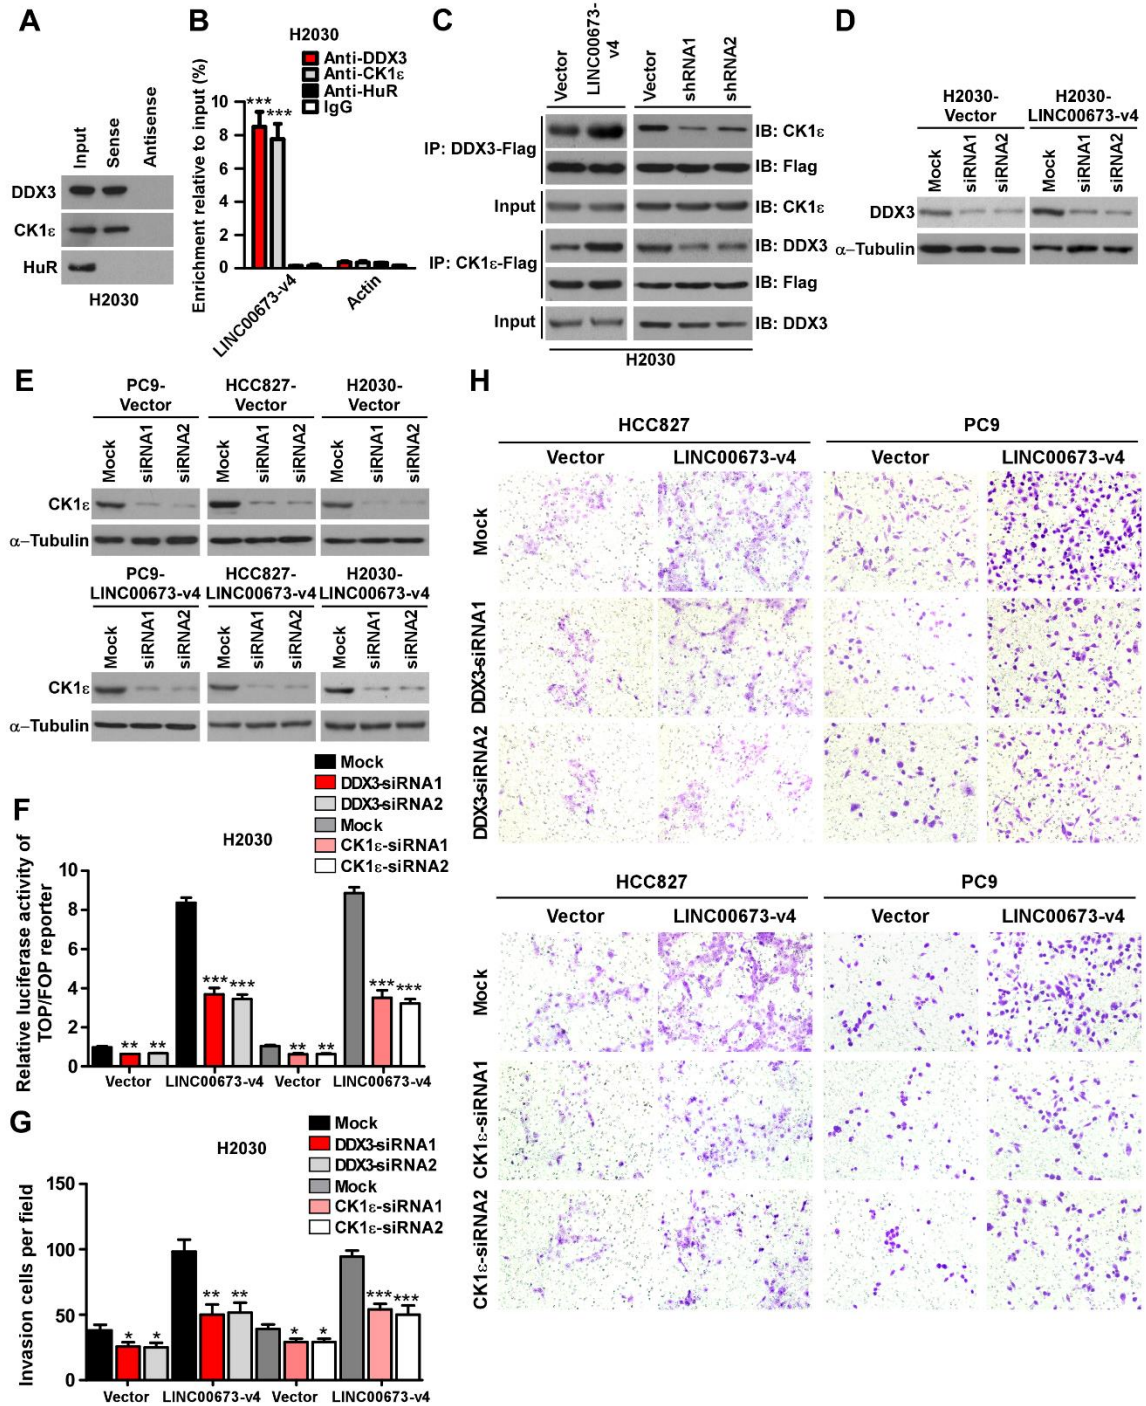

**Fig. S10. LINC00673-v4 interacts with DDX3 and CK1ε.**

(A) RNA pull-down experiment followed by WB analysis of LINC00673-v4 interactivational proteins in H2030 cells. (B) RIP assays after UV crosslink analyzed the interaction of LINC00673-v4 with DDX3 and CK1ε (each bar represents the mean ± SD derived from

three experiments, one-way ANOVA followed by Dunnett's multiple comparison test.  $***P < 0.001$ ). (C) Co-IP detection of the indicated proteins in indicated cells with LINC00673-v4 overexpression or knockdown. (D and E) WB analysis of the transfection of siCK1 $\epsilon$  (D) or siDDX3 (E) in LINC00673-v4-overexpressing and vector-control LAD cells. (F) Luciferase analysis of TCF/LEF transcriptional activity in indicated cells (each bar represents the mean  $\pm$  SD derived from three experiments, one-way ANOVA followed by Dunnett's multiple comparison test.  $**P < 0.01$ ,  $***P < 0.001$ ). (G) Quantification of invading cells using the Transwell invasion assay in LINC00673-v4-overexpressing and vector-control cells with depletion of CK1 $\epsilon$  or DDX3 (each bar represents the mean  $\pm$  SD derived from three experiments, one-way ANOVA followed by Dunnett's multiple comparison test.  $*P < 0.05$ ,  $**P < 0.01$ ,  $***P < 0.001$ ). (H) Representative micrographs of indicated invading cells analyzed by Matrigel-coated Transwell assay.

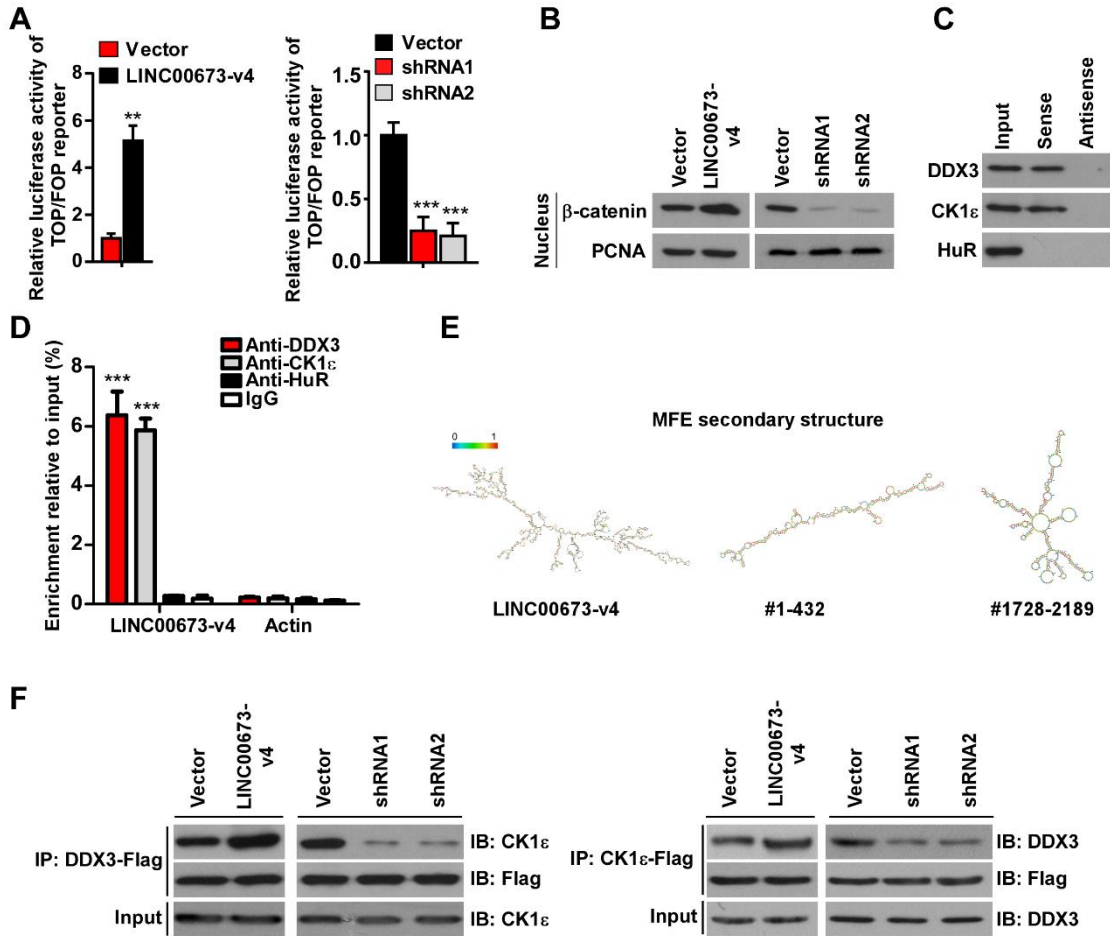

**Fig. S11. LINC00673-v4 enhances the interaction of DDX3 and CK1ε in patient-derived LAD cells.**

(A) The activity of Wnt/ $\beta$ -catenin signaling was analyzed by TOP/FOP luciferase activity assay (left: each bar represents the mean  $\pm$  SD derived from three independent experiments, two-tailed Student's t test; right: each bar represents the mean  $\pm$  SD derived from three experiments, one-way ANOVA followed by Dunnett's multiple comparison test.  $**P < 0.01$ ,  $***P < 0.001$ ). (B) Altered nuclear translocation of  $\beta$ -catenin were analyzed by WB analysis. PCNA was used as a loading control. (C) WB analysis data show binding of LINC00673-v4 with DDX3 and CK1ε. (D) RIP assays were performed to verify the interaction of LINC00673-v4 with DDX3 and CK1ε (each bar represents the

mean  $\pm$  SD derived from three experiments, one-way ANOVA followed by Dunnett's multiple comparison test. \*\*\* $P < 0.001$ ). (E) Two binding fragments with stable stem-loop structures predicted by RNA folding analysis. (F) Co-IP detection of the indicated proteins in indicated cells with LINC00673-v4 overexpression or knockdown.

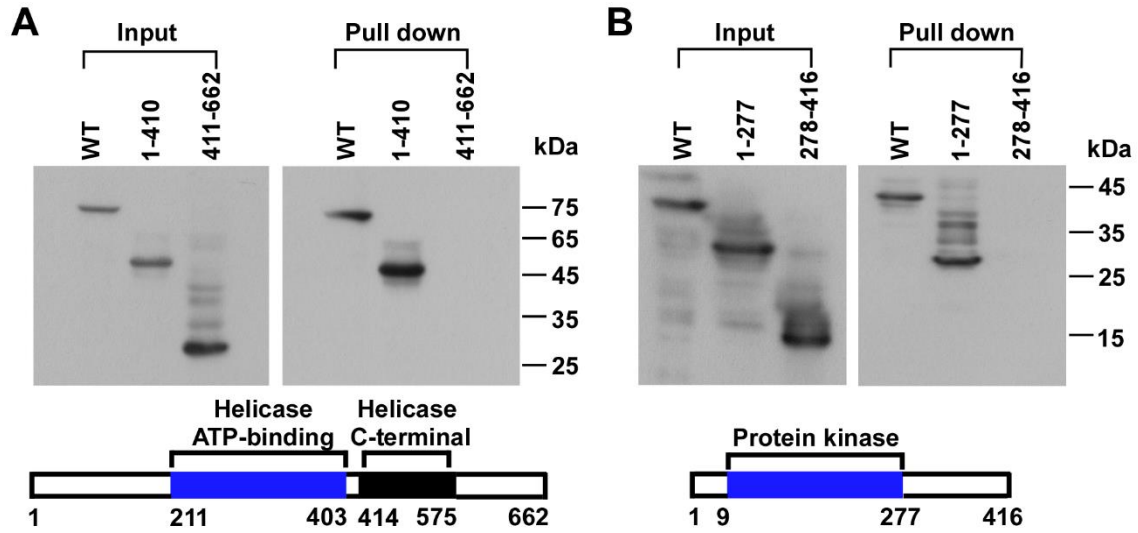

**Fig. S12. The helicase ATP-binding domain of DDX3 and the protein kinase domain of CK1 $\epsilon$  interacts with LINC00673-v4.**

(A and B) WB analysis of FLAG-tagged domain truncation mutants of DDX3 (A) and CK1 $\epsilon$  (B) retrieved by LINC00673-v4. The domain structure of DDX3 and CK1 $\epsilon$  was shown below, respectively.

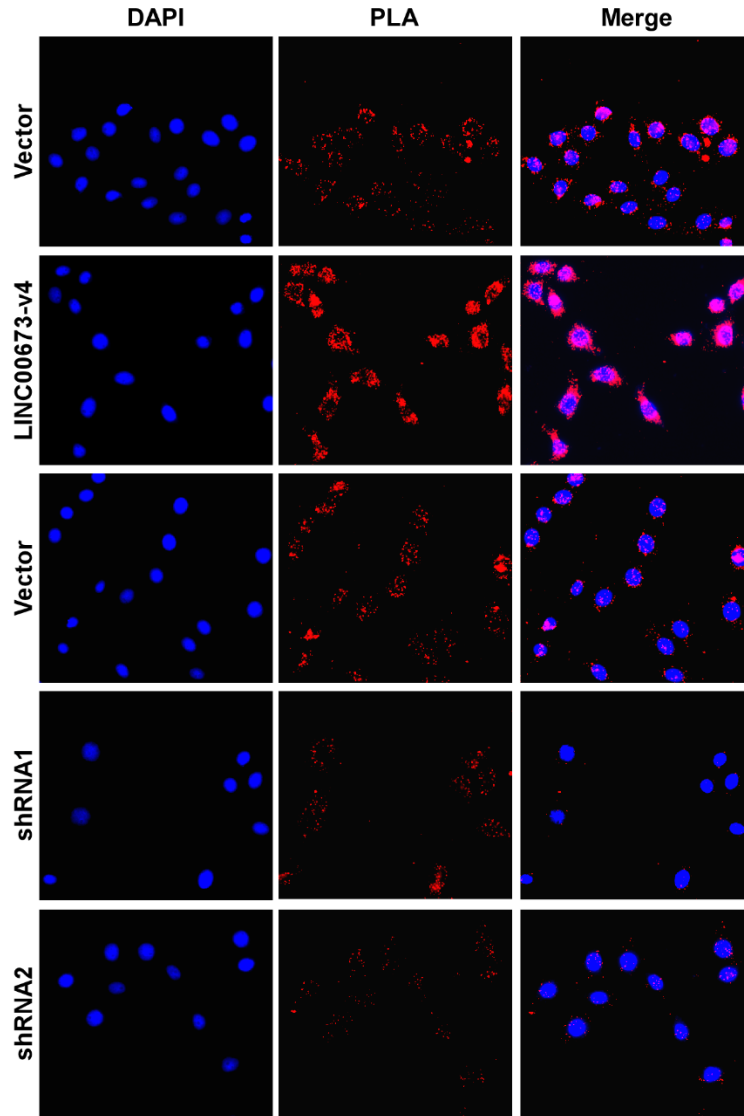

**Fig. S13. The interaction between DDX3 and CK1 $\epsilon$ .**

*In situ* Proximity Ligation Assay was performed to assess the interaction between DDX3 and CK1 $\epsilon$ .

**Table S1. LINC00673-v4 is located within a chromosomal region commonly amplified in NSCLC**

| <b>Amplified Region</b> | <b>Residual Q-value</b> | <b>Overall Frequency of Amplification</b> |
|-------------------------|-------------------------|-------------------------------------------|
| Chr17:55353997-78605474 | 0.128                   | 0.396                                     |

Data are taken from The Broad Institute's Tumorscape database (Nature. 2010; 463:899-905)

**Table S2. Clinicopathologic characteristics of LAD patients from SYSUCC cohort**

| <b>Characteristics</b>    | <b>Number of cases</b> | <b>Percentage</b> |
|---------------------------|------------------------|-------------------|
| <b>Gender</b>             |                        |                   |
| Male                      | 81                     | 68.1%             |
| Female                    | 38                     | 31.9%             |
| <b>Age (years)</b>        |                        |                   |
| >60                       | 44                     | 37.0%             |
| ≤60                       | 75                     | 63.0%             |
| <b>Clinical Stage</b>     |                        |                   |
| I + II                    | 67                     | 56.3%             |
| III+ IV                   | 52                     | 43.7%             |
| <b>T classification</b>   |                        |                   |
| T1 + T2                   | 84                     | 70.6%             |
| T3 + T4                   | 35                     | 29.4%             |
| <b>N classification</b>   |                        |                   |
| N0                        | 57                     | 47.9%             |
| N1                        | 25                     | 21.0%             |
| N2                        | 35                     | 29.4%             |
| N3                        | 2                      | 1.7%              |
| <b>Distant metastasis</b> |                        |                   |
| Yes                       | 6                      | 5.0%              |
| No                        | 113                    | 95.0%             |



**Table S3. Correlation between expressions of LINC00673-v4 and clinicopathologic features in LAD patients from SYSUCC cohort**

| <b>Characteristics</b>    | <b>cutoff</b> | <b>Below cutoff</b> |          | <b>Above cutoff</b> |          | <b>P-value</b> |
|---------------------------|---------------|---------------------|----------|---------------------|----------|----------------|
|                           |               | <b>N</b>            | <b>N</b> | <b>N</b>            | <b>N</b> |                |
| <b>Gender</b>             |               |                     |          |                     |          |                |
| Male                      | 13.996        | 62                  | 19       |                     |          | 0.071          |
| Female                    |               | 23                  | 15       |                     |          |                |
| <b>Age</b>                |               |                     |          |                     |          |                |
| >60                       | 10.320        | 12                  | 32       |                     |          | 0.093          |
| ≤ 60                      |               | 32                  | 43       |                     |          |                |
| <b>Clinical stage</b>     |               |                     |          |                     |          |                |
| I + II                    | 11.008        | 37                  | 30       |                     |          | 0.014          |
| III+ IV                   |               | 17                  | 35       |                     |          |                |
| <b>T classification</b>   |               |                     |          |                     |          |                |
| T1+T2                     | 17.455        | 76                  | 8        |                     |          | 0.021          |
| T3+T4                     |               | 26                  | 9        |                     |          |                |
| <b>LN metastasis</b>      |               |                     |          |                     |          |                |
| Yes                       | 11.970        | 27                  | 35       |                     |          | 0.006          |
| No                        |               | 39                  | 18       |                     |          |                |
| <b>Distant metastasis</b> |               |                     |          |                     |          |                |
| Yes                       | 13.079        | 3                   | 3        |                     |          | 0.498          |
| No                        |               | 72                  | 41       |                     |          |                |

**Table S4. Correlation between the clinicopathological features and LINC00673 CNV status in LAD patients from SYSCUU cohort**

| Characteristics           | LINC673 CNV status |     | P-value |
|---------------------------|--------------------|-----|---------|
|                           | non-Amp            | Amp |         |
| <b>Gender</b>             |                    |     |         |
| Male                      | 68                 | 13  | 0.102   |
| Female                    | 27                 | 11  |         |
| <b>Age (years)</b>        |                    |     |         |
| >60                       | 37                 | 7   | 0.375   |
| ≤ 60                      | 58                 | 17  |         |
| <b>Clinical stage</b>     |                    |     |         |
| I + II                    | 60                 | 7   | 0.003   |
| III + IV                  | 35                 | 17  |         |
| <b>T classification</b>   |                    |     |         |
| T1 + T2                   | 67                 | 17  | 0.976   |
| T3 + T4                   | 28                 | 7   |         |
| <b>LN metastasis</b>      |                    |     |         |
| Yes                       | 42                 | 20  | 0.001   |
| No                        | 53                 | 4   |         |
| <b>Distant metastasis</b> |                    |     |         |
| Yes                       | 4                  | 2   | 0.410   |
| No                        | 91                 | 22  |         |

**Table S5. Clinicopathologic characteristics of LAD patients from TCGA Dataset**

| <b>Characteristics</b>    | <b>Number of cases</b> | <b>Percentage</b> |
|---------------------------|------------------------|-------------------|
| <b>Gender</b>             |                        |                   |
| Male                      | 169                    | 49.4%             |
| Female                    | 173                    | 50.6%             |
| <b>Age (years)</b>        |                        |                   |
| >60                       | 220                    | 64.3%             |
| ≤60                       | 103                    | 30.1%             |
| Unknown                   | 19                     | 5.6%              |
| <b>Clinical stage</b>     |                        |                   |
| I+II                      | 259                    | 75.7%             |
| III+IV                    | 83                     | 24.3%             |
| <b>T classification</b>   |                        |                   |
| T1+ T2                    | 297                    | 86.8%             |
| T3+ T4                    | 45                     | 13.2%             |
| <b>N classification</b>   |                        |                   |
| N0                        | 212                    | 62.0%             |
| N1                        | 73                     | 21.3%             |
| N2                        | 56                     | 16.4%             |
| N3                        | 1                      | 0.3%              |
| <b>Distant metastasis</b> |                        |                   |
| Yes                       | 20                     | 5.8%              |
| No                        | 322                    | 94.2%             |

**Table S6. Correlation between expressions of LINC00673 and clinicopathologic features in LAD patients from TCGA Dataset**

| <b>Characteristics</b>    | <b>Below cutoff</b> |          | <b>Above cutoff</b> |  | <b>P-value</b> |
|---------------------------|---------------------|----------|---------------------|--|----------------|
|                           | <b>cutoff</b>       | <b>N</b> | <b>N</b>            |  |                |
| <b>Gender</b>             |                     |          |                     |  |                |
| Male                      | 1.590               | 76       | 93                  |  | 0.399          |
| Female                    |                     | 70       | 103                 |  |                |
| <b>Age</b>                |                     |          |                     |  |                |
| >60                       | 2.690               | 154      | 66                  |  | 0.104          |
| ≤ 60                      |                     | 81       | 22                  |  |                |
| unknown                   |                     | 19       |                     |  |                |
| <b>Clinical stage</b>     |                     |          |                     |  |                |
| I + II                    | 2.030               | 147      | 112                 |  | 0.120          |
| III+ IV                   |                     | 39       | 44                  |  |                |
| <b>T classification</b>   |                     |          |                     |  |                |
| T1+T2                     | 3.859               | 265      | 32                  |  | 0.000          |
| T3+T4                     |                     | 5        | 40                  |  |                |
| <b>LN metastasis</b>      |                     |          |                     |  |                |
| Yes                       | 0.898               | 19       | 111                 |  | 0.002          |
| No                        |                     | 62       | 150                 |  |                |
| <b>Distant metastasis</b> |                     |          |                     |  |                |
| Yes                       | 0.344               | 1        | 19                  |  | 0.592          |
| No                        |                     | 27       | 295                 |  |                |

**Table S7. List of LINC00673-v4 interacting proteins identified by mass spectrometry in band 1**

| <b>Protein</b> | <b>Entry name</b> | <b>Gene name</b> | <b>Unique peptides</b> |
|----------------|-------------------|------------------|------------------------|
| P52272         | HNRPM_HUMAN       | HNRPM            | 22                     |
| P02545         | LMNA_HUMAN        | LMNA             | 15                     |
| Q59F66         | Q59F66_HUMAN      | DDX17            | 6                      |
| P11021         | GRP78_HUMAN       | GRP78            | 4                      |
| O43390         | HNRPR_HUMAN       | HNRPR            | 3                      |
| Q5SSJ5         | HP1B3_HUMAN       | HP1BP3           | 3                      |
| A0A0D9SF53     | A0A0D9SF53_HUMAN  | DDX3X            | 2                      |
| Q15061         | WDR43_HUMAN       | WDR43            | 2                      |
| Q5BKZ1         | ZN326_HUMAN       | ZNF326           | 2                      |
| H0YAR2         | H0YAR2_HUMAN      | H0YAR2           | 2                      |

**Table S8. List of LINC00673-v4 interacting proteins identified by mass spectrometry in band 2**

| <b>Protein</b> | <b>Entry name</b> | <b>Gene name</b> | <b>Unique peptides</b> |
|----------------|-------------------|------------------|------------------------|
| Q9HCC0         | MCCB_HUMAN        | MCCC2            | 31                     |
| P14618         | KPYM_HUMAN        | PKM              | 31                     |
| P35527         | K1C9_HUMAN        | KRT9             | 29                     |
| P04264         | K2C1_HUMAN        | KRT1             | 24                     |
| Q9H078         | CLPB_HUMAN        | CLPB             | 24                     |
| P26599         | PTBP1_HUMAN       | PTBP1            | 21                     |
| P13645         | K1C10_HUMAN       | KRT10            | 16                     |
| Q15233         | NONO_HUMAN        | NONO             | 16                     |
| P09914         | IFIT1_HUMAN       | IFIT1            | 15                     |
| O75131         | CPNE3_HUMAN       | CPNE3            | 14                     |
| O14879         | IFIT3_HUMAN       | IFIT3            | 14                     |
| P11413         | G6PD_HUMAN        | G6PD             | 14                     |
| P04745         | AMY1_HUMAN        | AMY1A            | 13                     |
| P40227         | TCPZ_HUMAN        | CCT6A            | 13                     |
| P26368         | U2AF2_HUMAN       | U2AF2            | 12                     |
| Q9Y450         | HBS1L_HUMAN       | HBS1L            | 12                     |
| P12268         | IMDH2_HUMAN       | IMPDH2           | 10                     |
| P68363         | TBA1B_HUMAN       | TUBA1B           | 10                     |
| Q9UHR4         | BI2L1_HUMAN       | BAIAP2L1         | 9                      |
| O43143         | DHX15_HUMAN       | DHX15            | 9                      |
| Q99832         | TCPH_HUMAN        | CCT7             | 9                      |
| P07237         | PDIA1_HUMAN       | P4HB             | 9                      |
| P61978         | HNRPK_HUMAN       | HNRNPK           | 8                      |
| P02489         | CRYAA_HUMAN       | CRYAA            | 8                      |
| O43776         | SYNC_HUMAN        | NARS             | 8                      |
| P17844         | DDX5_HUMAN        | DDX5             | 8                      |
| Q8WWY3         | PRP31_HUMAN       | PRPF31           | 8                      |
| O43175         | SERA_HUMAN        | PHGDH            | 8                      |
| Q13325         | IFIT5_HUMAN       | IFIT5            | 7                      |
| Q9UN86         | G3BP2_HUMAN       | G3BP2            | 7                      |
| P11940         | PABP1_HUMAN       | PABPC1           | 6                      |
| P60709         | ACTB_HUMAN        | ACTB             | 6                      |
| P63261         | ACTG_HUMAN        | ACTG1            | 6                      |
| P25705         | ATPA_HUMAN        | ATP5A1           | 5                      |
| P01876         | IGHA1_HUMAN       | IGHA1            | 5                      |
| Q8WU90         | ZC3HF_HUMAN       | ZC3H15           | 5                      |
| Q13501         | SQSTM_HUMAN       | SQSTM1           | 5                      |
| P13647         | K2C5_HUMAN        | KRT5             | 4                      |
| P50991         | TCPD_HUMAN        | CCT4             | 4                      |

---

|        |             |          |   |
|--------|-------------|----------|---|
| P05109 | S10A8_HUMAN | S100A8   | 4 |
| P31948 | STIP1_HUMAN | STIP1    | 4 |
| O60701 | UGDH_HUMAN  | UGDH     | 4 |
| Q8N684 | CPSF7_HUMAN | CPSF7    | 4 |
| Q96GM8 | TOE1_HUMAN  | TOE1     | 4 |
| P68104 | EF1A1_HUMAN | EEF1A1   | 3 |
| Q5VTE0 | EF1A3_HUMAN | EEF1A1P5 | 3 |
| Q05639 | EF1A2_HUMAN | EEF1A2   | 3 |
| P02768 | ALBU_HUMAN  | ALB      | 3 |
| P01834 | IGKC_HUMAN  | IGKC     | 3 |
| P06576 | ATPB_HUMAN  | ATP5B    | 3 |
| P06702 | S10A9_HUMAN | S100A9   | 3 |
| P14866 | HNRPL_HUMAN | HNRNPL   | 3 |
| Q08211 | DHX9_HUMAN  | DHX9     | 3 |
| P19525 | E2AK2_HUMAN | EIF2AK2  | 3 |
| Q9UHD8 | SEPT9_HUMAN | SEPT9    | 3 |
| P01833 | PIGR_HUMAN  | PIGR     | 3 |
| Q96A33 | CCD47_HUMAN | CCDC47   | 3 |
| Q9BUJ2 | HNRL1_HUMAN | HNRNPUL1 | 3 |
| P62805 | H4_HUMAN    | HIST1H4A | 3 |
| P36578 | RL4_HUMAN   | RPL4     | 3 |
| Q8NC51 | PAIRB_HUMAN | SERBP1   | 3 |
| P09228 | CYTT_HUMAN  | CST2     | 2 |
| P07437 | TBB5_HUMAN  | TUBB     | 2 |
| P31943 | HNRH1_HUMAN | HNRNPH1  | 2 |
| Q13310 | PABP4_HUMAN | PABPC4   | 2 |
| P68371 | TBB4B_HUMAN | TUBB4B   | 2 |
| P19338 | NUCL_HUMAN  | NCL      | 2 |
| P0CF74 | IGLC6_HUMAN | IGLC6    | 2 |
| P0DOY2 | IGLC2_HUMAN | IGLC2    | 2 |
| P0DOY3 | IGLC3_HUMAN | IGLC3    | 2 |
| P05455 | LA_HUMAN    | SSB      | 2 |
| P12273 | PIP_HUMAN   | PIP      | 2 |
| P35637 | FUS_HUMAN   | FUS      | 2 |
| P23280 | CAH6_HUMAN  | CA6      | 2 |
| Q9NUQ6 | SPS2L_HUMAN | SPATS2L  | 2 |
| P06744 | G6PI_HUMAN  | GPI      | 2 |
| Q9ULV4 | COR1C_HUMAN | CORO1C   | 2 |
| O60832 | DKC1_HUMAN  | DKC1     | 2 |
| P01859 | IGHG2_HUMAN | IGHG2    | 2 |
| P01861 | IGHG4_HUMAN | IGHG4    | 2 |
| Q9Y6M1 | IF2B2_HUMAN | IGF2BP2  | 2 |
| Q9UJA5 | TRM6_HUMAN  | TRMT6    | 2 |
| Q9UQB8 | BAIP2_HUMAN | BAIAP2   | 2 |

---

---

|        |             |       |   |
|--------|-------------|-------|---|
| P78371 | TCPB_HUMAN  | CCT2  | 2 |
| Q9NRG9 | AAAS_HUMAN  | AAAS  | 2 |
| Q02790 | FKBP4_HUMAN | FKBP4 | 2 |
| O00505 | IMA4_HUMAN  | KPNA3 | 2 |
| P16989 | YBOX3_HUMAN | YBX3  | 2 |

---



**Table S9. List of LINC00673-v4 interacting proteins identified by mass spectrometry in band 3**

| <b>Protein</b> | <b>Entry name</b> | <b>Gene name</b> | <b>Unique peptides</b> |
|----------------|-------------------|------------------|------------------------|
| P06576         | ATPB_HUMAN        | ATP5B            | 23                     |
| P00367         | DHE3_HUMAN        | GLUD1            | 23                     |
| P25705         | ATPA_HUMAN        | ATP5A1           | 21                     |
| P35527         | K1C9_HUMAN        | KRT9             | 21                     |
| P13645         | K1C10_HUMAN       | KRT10            | 19                     |
| P05166         | PCCB_HUMAN        | PCCB             | 19                     |
| P05787         | K2C8_HUMAN        | KRT8             | 19                     |
| P68104         | EF1A1_HUMAN       | EEF1A1           | 18                     |
| P14868         | SYDC_HUMAN        | DARS             | 18                     |
| Q05639         | EF1A2_HUMAN       | EEF1A2           | 17                     |
| P04264         | K2C1_HUMAN        | KRT1             | 14                     |
| P05455         | LA_HUMAN          | SSB              | 14                     |
| Q9Y230         | RUVB2_HUMAN       | RUVBL2           | 14                     |
| P62495         | ERF1_HUMAN        | ETF1             | 14                     |
| Q9H0S4         | DDX47_HUMAN       | DDX47            | 13                     |
| P35908         | K22E_HUMAN        | KRT2             | 12                     |
| P04745         | AMY1_HUMAN        | AMY1A            | 12                     |
| P36578         | RL4_HUMAN         | RPL4             | 12                     |
| P26641         | EF1G_HUMAN        | EEF1G            | 12                     |
| O95793         | STAU1_HUMAN       | STAU1            | 12                     |
| Q96CW1         | AP2M1_HUMAN       | AP2M1            | 12                     |
| Q9P0V9         | SEP10_HUMAN       | SEPT10           | 11                     |
| P31943         | HNRH1_HUMAN       | HNRNPH1          | 10                     |
| Q9NVA2         | SEP11_HUMAN       | SEPT11           | 9                      |
| Q9UMS4         | PRP19_HUMAN       | PRPF19           | 9                      |
| Q9Y265         | RUVB1_HUMAN       | RUVBL1           | 8                      |
| P02489         | CRYAA_HUMAN       | CRYAA            | 8                      |
| Q9Y3I0         | RTCB_HUMAN        | RTCB             | 8                      |
| Q9BUF5         | TBB6_HUMAN        | TUBB6            | 7                      |
| P04637         | P53_HUMAN         | TP53             | 7                      |
| Q96P11         | NSUN5_HUMAN       | NSUN5            | 7                      |
| P51648         | AL3A2_HUMAN       | ALDH3A2          | 7                      |
| P55795         | HNRH2_HUMAN       | HNRNPH2          | 6                      |
| Q2VIR3         | IF2GL_HUMAN       | EIF2S3L          | 6                      |
| P41091         | IF2G_HUMAN        | EIF2S3           | 6                      |
| Q8NCE0         | SEN2_HUMAN        | TSEN2            | 6                      |
| P19338         | NUCL_HUMAN        | NCL              | 6                      |
| P07437         | TBB5_HUMAN        | TUBB             | 5                      |
| P60709         | ACTB_HUMAN        | ACTB             | 5                      |
| P63261         | ACTG_HUMAN        | ACTG1            | 5                      |

---

|        |             |          |   |
|--------|-------------|----------|---|
| Q14974 | IMB1_HUMAN  | KPNB1    | 5 |
| O00148 | DX39A_HUMAN | DDX39A   | 5 |
| P68366 | TBA4A_HUMAN | TUBA4A   | 4 |
| Q14141 | SEPT6_HUMAN | SEPT6    | 4 |
| Q92599 | SEPT8_HUMAN | SEPT8    | 4 |
| Q86U42 | PABP2_HUMAN | PABPN1   | 4 |
| Q9UKS6 | PACN3_HUMAN | PACSIN3  | 4 |
| P18754 | RCC1_HUMAN  | RCC1     | 4 |
| Q9NQC3 | RTN4_HUMAN  | RTN4     | 4 |
| P12081 | SYHC_HUMAN  | HARS     | 4 |
| Q9H814 | PHAX_HUMAN  | PHAX     | 4 |
| Q16576 | RBBP7_HUMAN | RBBP7    | 4 |
| Q9P258 | RCC2_HUMAN  | RCC2     | 4 |
| Q9NUL3 | STAU2_HUMAN | STAU2    | 4 |
| P13647 | K2C5_HUMAN  | KRT5     | 3 |
| P01876 | IGHA1_HUMAN | IGHA1    | 3 |
| P48730 | KC1D_HUMAN  | CSNK1D   | 3 |
| P49674 | KC1E_HUMAN  | CSNK1E   | 3 |
| Q12849 | GRSF1_HUMAN | GRSF1    | 3 |
| P26196 | DDX6_HUMAN  | DDX6     | 3 |
| Q92989 | CLP1_HUMAN  | CLP1     | 3 |
| Q8IZP2 | ST134_HUMAN | ST13P4   | 3 |
| P50502 | F10A1_HUMAN | ST13     | 3 |
| O60825 | F262_HUMAN  | PFKFB2   | 3 |
| Q15084 | PDIA6_HUMAN | PDIA6    | 3 |
| P13639 | EF2_HUMAN   | EEF2     | 3 |
| P62805 | H4_HUMAN    | HIST1H4A | 3 |
| Q7L5N7 | PCAT2_HUMAN | LPCAT2   | 3 |
| P01833 | PIGR_HUMAN  | PIGR     | 3 |
| P0CG12 | CTF8A_HUMAN | CHTF8    | 3 |
| Q9NR50 | EI2BG_HUMAN | EIF2B3   | 3 |
| Q9BQE3 | TBA1C_HUMAN | TUBA1C   | 2 |
| Q13509 | TBB3_HUMAN  | TUBB3    | 2 |
| P02768 | ALBU_HUMAN  | ALB      | 2 |
| P09228 | CYTT_HUMAN  | CST2     | 2 |
| P01834 | IGKC_HUMAN  | IGKC     | 2 |
| Q16658 | FSCN1_HUMAN | FSCN1    | 2 |
| P05109 | S10A8_HUMAN | S100A8   | 2 |
| P36957 | ODO2_HUMAN  | DLST     | 2 |
| Q8IUF8 | MINA_HUMAN  | MINA     | 2 |
| P23280 | CAH6_HUMAN  | CA6      | 2 |
| Q9NW64 | RBM22_HUMAN | RBM22    | 2 |
| P11413 | G6PD_HUMAN  | G6PD     | 2 |
| Q8N1N4 | K2C78_HUMAN | KRT78    | 2 |

---

**Table S10. List of LINC00673-v4 interacting proteins identified by mass spectrometry in band 4**

| <b>Protein</b> | <b>Entry name</b> | <b>Gene name</b> | <b>Unique peptides</b> |
|----------------|-------------------|------------------|------------------------|
| P49674         | KC1E_HUMAN        | CSNK1E           | 17                     |
| P04745         | AMY1_HUMAN        | AMY1A            | 10                     |
| P36578         | RL4_HUMAN         | RPL4             | 10                     |
| P13645         | K1C10_HUMAN       | KRT10            | 8                      |
| P07437         | TBB5_HUMAN        | TUBB             | 8                      |
| P04264         | K2C1_HUMAN        | KRT1             | 7                      |
| P26641         | EF1G_HUMAN        | EEF1G            | 7                      |
| P02489         | CRYAA_HUMAN       | CRYAA            | 7                      |
| P68104         | EF1A1_HUMAN       | EEF1A1           | 6                      |
| P35908         | K22E_HUMAN        | KRT2             | 5                      |
| Q05639         | EF1A2_HUMAN       | EEF1A2           | 4                      |
| P35527         | K1C9_HUMAN        | KRT9             | 4                      |
| P41091         | IF2G_HUMAN        | EIF2S3           | 4                      |
| P11142         | HSP7C_HUMAN       | HSPA8            | 3                      |
| P08779         | K1C16_HUMAN       | KRT16            | 3                      |
| P12273         | PIP_HUMAN         | PIP              | 3                      |
| P60709         | ACTB_HUMAN        | ACTB             | 3                      |
| P63261         | ACTG_HUMAN        | ACTG1            | 3                      |
| P06733         | ENOA_HUMAN        | ENO1             | 3                      |
| P01876         | IGHA1_HUMAN       | IGHA1            | 3                      |
| P20042         | IF2B_HUMAN        | EIF2S2           | 3                      |
| P02538         | K2C6A_HUMAN       | KRT6A            | 2                      |
| P13647         | K2C5_HUMAN        | KRT5             | 2                      |
| P09228         | CYTT_HUMAN        | CST2             | 2                      |
| P01834         | IGKC_HUMAN        | IGKC             | 2                      |
| P81605         | DCD_HUMAN         | DCD              | 2                      |
| P23280         | CAH6_HUMAN        | CA6              | 2                      |

**Table S11. Spearman correlation analysis between LINC00673-v4 level and expression of nuclear  $\beta$ -catenin, Twist, HOXB9, MMP9, and VEGF**

| Variables                | LINC00673-v4         |          |
|--------------------------|----------------------|----------|
|                          | Spearman correlation | <i>P</i> |
| Nuclear $\beta$ -catenin | 0.238                | 0.009    |
| TWIST                    | 0.205                | 0.025    |
| HOXB9                    | 0.197                | 0.032    |
| MMP9                     | 0.191                | 0.038    |
| VEGF                     | 0.202                | 0.028    |

**Table S12. SiRNA sequences**

| <b>Target gene</b> | <b>Sequences (5' to 3')</b> |
|--------------------|-----------------------------|
| LINC00673-1        | CCAGUGUGUGCUGAUGACACAUACA   |
| LINC00673-2        | GCUUUCUACCACACCCUUUCU       |
| CK1 $\epsilon$ -1  | CAACAUACCUCAACUUCUG         |
| CK1 $\epsilon$ -2  | GAGCAAAGCCGUCGAGAUG         |
| DDX3X-1            | CGAGAGAGUUGGCAGUACA         |
| DDX3X-2            | CAUUGAGCUUACUCGUUAU         |
| LEF1-1             | GUUAUUCGGGUACAUAUU          |
| LEF1-2             | UCAGAUGUCAACUCCAAACAA       |
| TCF4-1             | AAGUCCGAGAAAGGAAUCUGA       |
| TCF4-2             | GAACCUAUCUCCAGAUGAAUU       |

**Table S13. Primers for RACE analysis**

| <b>Primer name</b> | <b>Sequences (5' to 3')</b>  |
|--------------------|------------------------------|
| 5' RACE-1          | AAGCACCCACCGAGTCAGCCAGAAACCT |
| 5' RACE-2          | GGTTTCTGGCTGACTCGGTGGGTGCTTT |
| 3' RACE-1          | GAGACAGGGTCTCTCGCTCTTTTGCCCA |
| 3' RACE-2          | GGAGAATAAAGAGACCTCTGGATTTGAG |

**Table S14. Primer sequences for qRT-PCR**

| <b>Target gene</b> | <b>Sequences (5' to 3')</b>                                         |
|--------------------|---------------------------------------------------------------------|
| LINC00673-V1       | Forward: ATTTTCCCTCTCCACCCTGG<br>Reverse: CCAGCCCTGTAGAGGTCCTCA     |
| LINC00673-V2       | Forward: CAAGCTGGAGGTGGAATCAGAGG<br>Reverse: AGGAGGTGGCACCTCTTTCTTG |
| LINC00673-V3       | Forward: ATTTTCCCTCTCCACCCTGG<br>Reverse: GTCCTTCCCATCCTCTTTCTTG    |
| LINC00673-V4       | Forward: CAAGCTGGAGGTGGAATCAGAGG<br>Reverse: GTCCTTCCCATCCTCTTTCTTG |
| LINC00673-V5       | Forward: AGATCAGGTTCAAGTTGCCAG<br>Reverse: CTGCAGGGCCGGGAGGAGAGG    |
| HOXB9              | Forward: TCCAGCGTCTGGTATTTGGT<br>Reverse: GAAGCGAGGACAAAGAGAGG      |
| Twist              | Forward : TCCATTTTCTCCTTCTCTGGAA<br>Reverse: GTCCGCGTCCCCTACTAGC    |
| MMP9               | Forward :ACGACGTCTTCCAGTACCGA<br>Reverse :TTGGTCCACCTGGTTCAACT      |
| VEGF               | Forward: CTACCTCCACCATGCCAAGT<br>Reverse: AGCTGCGCTGATAGACATCC      |
| ACTB               | Forward: GTTGTCGACGACGAGCG<br>Reverse: GCACAGAGCCTCGCCTT            |
| U6                 | Forward: CTCGCTTCGGCAGCACA<br>Reverse: AACGCTTCACGAATTTGCGT         |
| GAPDH              | Forward: GACTCATGACCACAGTCCATGC<br>Reverse: AGAGGCAGGGATGATGTTCTG   |
| LINC0673           | Forward: CTCATTGACCTGCACGAAGA<br>Reverse: AGCTCACATCGTCAGGCTTT      |
| -CNV               | Forward: AAAGCCGCTCAACTACATGG<br>Reverse: TGCTTTGAATGCGTCCCAGAG     |
| LINE-1-CNV         | Forward: AAAGCCGCTCAACTACATGG<br>Reverse: TGCTTTGAATGCGTCCCAGAG     |

**Table S15. Probe sequence used in ISH and Northern blot analysis**

| <b>Probe name</b> | <b>Probe sequence (5' to 3')</b> |
|-------------------|----------------------------------|
| Probe             | CTGCTTGCAACACACAAACT             |



## References

1. Cai J, et al. (2017) Simultaneous overactivation of Wnt/beta-catenin and TGFbeta signalling by miR-128-3p confers chemoresistance-associated metastasis in NSCLC. *Nat Commun* 8:15870.
2. Pecze L, Blum W, Schwaller B (2015) Routes of Ca<sup>2+</sup> Shuttling during Ca<sup>2+</sup> Oscillations: FOCUS ON THE ROLE OF MITOCHONDRIAL Ca<sup>2+</sup> HANDLING AND CYTOSOLIC Ca<sup>2+</sup> BUFFERS. *J Biol Chem* 290(47):28214-28230.
3. Liu L, et al. (2017) Astrocyte Elevated Gene 1 Interacts with Acetyltransferase p300 and c-Jun To Promote Tumor Aggressiveness. *Mol Cell Biol* 37(5).
4. Okudela K, et al. (2007) PIK3CA mutation and amplification in human lung cancer. *Pathol Int* 57(10):664-671.
5. Jiang L, et al. (2012) MicroRNA-30e\* promotes human glioma cell invasiveness in an orthotopic xenotransplantation model by disrupting the NF-kappaB/IkappaBalpha negative feedback loop. *J Clin Invest* 122(1):33-47.
6. Gomez-Martin C, et al. (2013) Level of HER2 gene amplification predicts response and overall survival in HER2-positive advanced gastric cancer treated with trastuzumab. *J Clin Oncol* 31(35):4445-4452.
7. Zlobec I, et al. (2007) A simple and reproducible scoring system for EGFR in colorectal cancer: application to prognosis and prediction of response to preoperative brachytherapy. *Br J Cancer* 96(5):793-800.
8. Dumbovic G, et al. (2018) A novel long non-coding RNA from NBL2 pericentromeric macrosatellite forms a perinucleolar aggregate structure in colon cancer. *Nucleic Acids Res* 46(11):5504-5524.
9. Li J, et al. (2010) Oncoprotein Bmi-1 renders apoptotic resistance to glioma cells through activation of the IKK-nuclear factor-kappaB Pathway. *Am J Pathol* 176(2):699-709.
